# Supplementary material for: Causes and Predictors of Readmission in Patients With Atrial Fibrillation Undergoing Catheter Ablation: A National Population‐Based Cohort Study
Source: PubMed Central journal article supplement — J Am Heart Assoc. 2018 Jun 15;7(12):e009294. doi: 10.1161/JAHA.118.009294 (PMC6220533; doi:10.1161/jaha.118.009294), 2018-06-15

# **SUPPLEMENTAL MATERIAL**

**Table S1. International Classification of Disease, Version 9 (ICD-9) Codes Used for Atrial Fibrillation and AF ablation case Identification.**

| <b>Inclusion Criteria</b>                                                               | <b>ICD-9 Codes</b>                                  |
|-----------------------------------------------------------------------------------------|-----------------------------------------------------|
| Atrial fibrillation (primary position)                                                  | 427.31                                              |
| Ablation of heart tissue via a peripherally inserted catheter (any position)            | 37.34                                               |
|                                                                                         |                                                     |
| <b>Exclusion Criteria</b>                                                               | <b>ICD-9 Codes</b>                                  |
| Supraventricular tachycardia                                                            | 427.0                                               |
| Ventricular tachycardia                                                                 | 427.1                                               |
| Atrial flutter                                                                          | 427.32                                              |
| Other premature beats                                                                   | 427.69                                              |
| Cardiac dysrhythmia                                                                     | 427.89                                              |
| Wolf-Parkinson-White                                                                    | 426.7                                               |
| Lown-Ganong-Levine                                                                      | 426.81                                              |
| Atrioventricular nodal tachycardia                                                      | 426.89                                              |
| Pacemaker implantation                                                                  | 00.50, 00.52, 00.53, 37.71 to 37.79, 37.81 to 37.89 |
| Implantable cardioverter defibrillator implantation                                     | 37.94 to 37.98, 00.51, 00.54                        |
| Open surgical ablation *                                                                | 37.33                                               |
| *Open surgical ablation: excision or destruction of lesion of heart using open approach |                                                     |

**Table S2. ICD 9 codes for admitting diagnosis of readmission.**

| Causes of Readmission                          | Result (%)   |              | Level 1 | Level 2 | Level 3 |
|------------------------------------------------|--------------|--------------|---------|---------|---------|
|                                                | No ablation  | ablation     |         |         |         |
| <b>Total Readmission</b>                       |              |              |         |         |         |
| <b>Cardiac causes/complication</b>             | <b>49.43</b> | <b>59.07</b> | 1       |         |         |
| Heart failure                                  | 12.03        | 12.63        |         | A       |         |
| Arrhythmia                                     | 27.16        | 35.18        |         | B       |         |
| <i>Atrial Fibrillation</i>                     | 22.7         | 24.8         |         |         | I       |
| <i>Atrial Flutter</i>                          | 4.8          | 5.1          |         |         | III     |
| <i>Heart block excluding 1st degree block</i>  | 0.2          | 0.1          |         |         | II      |
| <i>Sinoatrial node dysfunction</i>             | 1.51         | 1.64         |         |         | V       |
| <i>Paroxysmal ventricular tachycardia</i>      | 0.67         | 0.68         |         |         | VI      |
| <i>Paroxysmal supraventricular tachycardia</i> | 0.47         | 0.52         |         |         | VII     |
| <i>Others<sup>&amp;</sup></i>                  | 3.25         | 5.15         |         |         | IV      |
| Ischemic heart disease                         | 3.19         | 2.31         |         | C       |         |
| Heart Valve disease                            | 1.4          | 0.68         |         | D       |         |
| Hypertension                                   | 0.29         | 0.28         |         | E       |         |
| Hypotension/dizziness/syncope                  | 1.6          | 1.42         |         | F       |         |
| Pericardial complications                      | 0.42         | 2.05         |         | G       |         |
| Other cardiac complication                     | 3.34         | 4.52         |         | H       |         |
| <b>Overall Vascular causes/complications</b>   | <b>1.06</b>  | <b>2.22</b>  | 2       |         |         |
| <b>Infections</b>                              | <b>7.26</b>  | <b>4.85</b>  | 3       |         |         |
| Septicemia                                     | 4.14         | 2.26         |         | A       |         |
| <b>Pulmonary causes/complications</b>          | <b>10.51</b> | <b>8.28</b>  | 4       |         |         |
| Respiratory Failure                            | 1.73         | 1.01         |         | A       |         |
| Chronic obstructive lung diseases              | 2.98         | 2.2          |         | B       |         |

|                                                                                                                                                                                                                                                                                                                                             |             |             |    |   |    |
|---------------------------------------------------------------------------------------------------------------------------------------------------------------------------------------------------------------------------------------------------------------------------------------------------------------------------------------------|-------------|-------------|----|---|----|
| Pneumonia                                                                                                                                                                                                                                                                                                                                   | 3.61        | 2.71        |    | C |    |
| Other respiratory causes/complications                                                                                                                                                                                                                                                                                                      | 2.19        | 2.36        |    | D |    |
| <b><i>GI causes/complication</i></b>                                                                                                                                                                                                                                                                                                        | <b>4.69</b> | <b>4.28</b> | 5  |   |    |
| <b><i>Neurological complications</i></b>                                                                                                                                                                                                                                                                                                    | <b>4.06</b> | <b>2.8</b>  | 6  |   |    |
| Ischemic Stroke/Transient ischemic attack                                                                                                                                                                                                                                                                                                   | 2.48        | 1.59        |    | A |    |
| Other Neurological causes/complications                                                                                                                                                                                                                                                                                                     | 1.58        | 1.21        |    | B |    |
| <b><i>Kidney or Urinary causes/complications</i></b>                                                                                                                                                                                                                                                                                        | <b>5.42</b> | <b>3.73</b> | 7  |   |    |
| Electrolyte imbalance                                                                                                                                                                                                                                                                                                                       | 0.89        | 0.79        |    | A |    |
| Acute/Acute on chronic kidney failure                                                                                                                                                                                                                                                                                                       | 2.34        | 1.51        |    | B |    |
| Other kidney/urinary tract etiology/complication                                                                                                                                                                                                                                                                                            | 2.19        | 1.43        |    | C |    |
| <b><i>Hematology</i></b>                                                                                                                                                                                                                                                                                                                    | <b>1.28</b> | <b>0.5</b>  | 8  |   |    |
| Anemia                                                                                                                                                                                                                                                                                                                                      | 0.58        | 0.25        |    | A |    |
| Others                                                                                                                                                                                                                                                                                                                                      | 0.7         | 0.25        |    | B |    |
| <b><i>Trauma/Fracture/poisoning</i></b>                                                                                                                                                                                                                                                                                                     | <b>2.52</b> | <b>1.2</b>  | 9  |   |    |
| <b><i>Endocrine causes</i></b>                                                                                                                                                                                                                                                                                                              | <b>1.07</b> | <b>0.58</b> | 10 |   |    |
| Diabetes mellitus                                                                                                                                                                                                                                                                                                                           | 0.77        | 0.37        |    | A |    |
| Others                                                                                                                                                                                                                                                                                                                                      | 0.3         | 0.21        |    | B |    |
| <b><i>Malignancy</i></b>                                                                                                                                                                                                                                                                                                                    | <b>2.27</b> | <b>1.21</b> | 11 |   |    |
| <b><i>Bleeding complications</i></b>                                                                                                                                                                                                                                                                                                        | <b>4.09</b> | <b>4.99</b> | 12 |   |    |
| Gastrointestinal bleed                                                                                                                                                                                                                                                                                                                      | 2.6         | 1.7         |    | A |    |
| Intracranial bleed                                                                                                                                                                                                                                                                                                                          | 0.57        | 0.59        |    | B |    |
| <i>Intracranial bleed without trauma</i>                                                                                                                                                                                                                                                                                                    | 0.29        | 0.39        |    |   | I  |
| <i>Intracranial bleed with trauma</i>                                                                                                                                                                                                                                                                                                       | 0.28        | 0.2         |    |   | II |
| Other bleeding complications                                                                                                                                                                                                                                                                                                                | 0.92        | 2.7         |    | C |    |
| <b><i>Psychiatry causes</i></b>                                                                                                                                                                                                                                                                                                             | <b>1.68</b> | <b>0.67</b> | 13 |   |    |
| <b><i>Pulmonary Embolism (PE)/Deep Venous Thrombosis (DVT)</i></b>                                                                                                                                                                                                                                                                          | <b>0.91</b> | <b>1.1</b>  | 14 |   |    |
| <b><i>Others</i><sup>¥</sup></b>                                                                                                                                                                                                                                                                                                            | <b>4.71</b> | <b>4.54</b> | 15 |   |    |
| <p>¥ : Skin, subcutaneous, joints, nonspecific lab findings, nonspecific symptoms<br/> &amp; : Other Arrhythmia Includes: Anomalous atrioventricular excitation, Long QT syndrome, Other specified conduction disorders, Conduction disorder, unspecified, Paroxysmal tachycardia, unspecified, Supraventricular premature beats, Other</p> |             |             |    |   |    |

premature beats, Other specified cardiac dysrhythmias, Cardiac dysrhythmia, unspecified, *First Degree AV block, Ventricular Fibrillation, Cardiac Arrest*

**Description of ICD codes for etiology of 90 days readmission.**

| <b>DX1</b> | <b>ablation</b> | <b>Description of ICD codes</b>                                                                                                                         | <b>Level 1</b> | <b>Level 2</b> | <b>Level 3</b> |
|------------|-----------------|---------------------------------------------------------------------------------------------------------------------------------------------------------|----------------|----------------|----------------|
| 39891      | 0.036260668     | Rheumatic heart failure (congestive)                                                                                                                    | 1              | A              |                |
| 40291      | 0.26092969      | Unspecified hypertensive heart disease with heart failure                                                                                               | 1              | A              |                |
| 40401      | 0.022279705     | Hypertensive heart and chronic kidney disease, malignant, with heart failure and with chronic kidney disease stage I through stage IV, or unspecified   | 1              | A              |                |
| 40491      | 0.338849599     | Hypertensive heart and chronic kidney disease, unspecified, with heart failure and with chronic kidney disease stage I through stage IV, or unspecified | 1              | A              |                |
| 40493      | 0.050807221     | Hypertensive heart and chronic kidney disease, unspecified, with heart failure and chronic kidney disease stage V or end stage renal disease            | 1              | A              |                |
| 4280       | 2.394352994     | Congestive heart failure, unspecified                                                                                                                   | 1              | A              |                |
| 42821      | 0.27394774      | Acute systolic heart failure                                                                                                                            | 1              | A              |                |
| 42822      | 0.349072797     | Chronic systolic heart failure                                                                                                                          | 1              | A              |                |
| 42823      | 4.25221247      | Acute on chronic systolic heart failure                                                                                                                 | 1              | A              |                |
| 42830      | 0.259192667     | Diastolic heart failure, unspecified                                                                                                                    | 1              | A              |                |
| 42831      | 0.81341855      | Acute diastolic heart failure                                                                                                                           | 1              | A              |                |
| 42832      | 0.104429961     | Chronic diastolic heart failure                                                                                                                         | 1              | A              |                |
| 42833      | 2.654674356     | Acute on chronic diastolic heart failure                                                                                                                | 1              | A              |                |
| 42841      | 0.134342438     | Acute combined systolic and diastolic heart failure                                                                                                     | 1              | A              |                |
| 42842      | 0.06952436      | Chronic combined systolic and diastolic heart failure                                                                                                   | 1              | A              |                |
| 42843      | 0.618413088     | Acute on chronic combined systolic and diastolic heart failure                                                                                          | 1              | A              |                |
|            | 12.6327083      |                                                                                                                                                         |                |                |                |
| 42731      | 24.75072829     | Atrial fibrillation                                                                                                                                     | 1              | B              | I              |
| 4260       | 0.080683542     | Atrioventricular block, complete                                                                                                                        | 1              | B              | II             |
| 42613      | 0.022784517     | Other second degree atrioventricular block                                                                                                              | 1              | B              | II             |

|       |             |                                                                              |   |   |     |
|-------|-------------|------------------------------------------------------------------------------|---|---|-----|
| 4266  | 0.038978028 | Other heart block                                                            | 1 | B | II  |
|       | 0.142446087 |                                                                              |   |   |     |
| 42732 | 5.091023432 | Atrial flutter                                                               | 1 | B | III |
| 42611 | 0.021530677 | First degree atrioventricular block                                          | 1 | B | IV  |
| 42682 | 0.027033107 | Long QT syndrome                                                             | 1 | B | IV  |
| 4270  | 0.51751844  | Paroxysmal supraventricular tachycardia                                      | 1 | B | VI  |
| 4271  | 0.683194576 | Paroxysmal ventricular tachycardia                                           | 1 | B | VII |
| 42741 | 0.050504862 | Ventricular fibrillation                                                     | 1 | B | IV  |
| 4275  | 0.054151914 | Cardiac arrest                                                               | 1 | B | IV  |
| 42761 | 0.024487388 | Supraventricular premature beats                                             | 1 | B | IV  |
| 42769 | 0.028269532 | Other premature beats                                                        | 1 | B | IV  |
| 42781 | 1.637933889 | Sinoatrial node dysfunction                                                  | 1 | B | V   |
| 42789 | 2.105232573 | Other specified cardiac dysrhythmias                                         | 1 | B | IV  |
|       | 5.149856958 |                                                                              |   |   |     |
| 41011 | 0.022063184 | Acute myocardial infarction of other anterior wall, initial episode of care  | 1 | C |     |
| 41031 | 0.020023381 | Acute myocardial infarction of inferoposterior wall, initial episode of care | 1 | C |     |
| 41041 | 0.063151413 | Acute myocardial infarction of other inferior wall, initial episode of care  | 1 | C |     |
| 41071 | 0.606229818 | Subendocardial infarction, initial episode of care                           | 1 | C |     |
| 41091 | 0.032394118 | Acute myocardial infarction of unspecified site, initial episode of care     | 1 | C |     |
| 4111  | 0.078918602 | Intermediate coronary syndrome                                               | 1 | C |     |
| 41189 | 0.022315896 | Other acute and subacute forms of ischemic heart disease, other              | 1 | C |     |
| 4139  | 0.065858959 | Other and unspecified angina pectoris                                        | 1 | C |     |
| 41400 | 0.202706286 | Coronary atherosclerosis of unspecified type of vessel, native or graft      | 1 | C |     |
| 41401 | 1.087796989 | Coronary atherosclerosis of native coronary artery                           | 1 | C |     |
| 41402 | 0.047806561 | Coronary atherosclerosis of autologous vein bypass graft                     | 1 | C |     |
| 4148  | 0.064327422 | Other specified forms of chronic ischemic heart disease                      | 1 | C |     |
|       | 2.313592629 |                                                                              |   |   |     |
| 3963  | 0.020267879 | Mitral valve insufficiency and aortic valve insufficiency                    | 1 | D |     |
| 4240  | 0.361413326 | Mitral valve disorders                                                       | 1 | D |     |

|       |             |                                                                           |   |   |  |
|-------|-------------|---------------------------------------------------------------------------|---|---|--|
| 4241  | 0.293776683 | Aortic valve disorders                                                    | 1 | D |  |
|       | 0.675457888 |                                                                           |   |   |  |
| 4010  | 0.109288697 | Malignant essential hypertension                                          | 1 | E |  |
| 4019  | 0.172022664 | Unspecified essential hypertension                                        | 1 | E |  |
|       | 0.281311361 |                                                                           |   |   |  |
| 4580  | 0.285757077 | Orthostatic hypotension                                                   | 1 | F |  |
| 45821 | 0.02426044  | Hypotension of hemodialysis                                               | 1 | F |  |
| 45829 | 0.196623041 | Other iatrogenic hypotension                                              | 1 | F |  |
| 4589  | 0.164733289 | Hypotension, unspecified                                                  | 1 | F |  |
| 7802  | 0.573606766 | Syncope and collapse                                                      | 1 | F |  |
| 7804  | 0.176691901 | Dizziness and giddiness                                                   | 1 | F |  |
|       | 1.421672513 |                                                                           |   |   |  |
| 42090 | 0.355718794 | Acute pericarditis, unspecified                                           | 1 | G |  |
| 42099 | 0.14066765  | Other acute pericarditis                                                  | 1 | G |  |
| 4230  | 0.075688301 | Hemopericardium                                                           | 1 | G |  |
| 4232  | 0.055389334 | Constrictive pericarditis                                                 | 1 | G |  |
| 4238  | 0.075844492 | Other specified diseases of pericardium                                   | 1 | G |  |
| 4239  | 1.348453844 | Unspecified disease of pericardium                                        | 1 | G |  |
|       | 2.051762415 |                                                                           |   |   |  |
| 4254  | 0.074442147 | Other primary cardiomyopathies                                            | 1 | H |  |
| 4290  | 0.017572024 | Myocarditis, unspecified                                                  | 1 | H |  |
| 4294  | 0.148575471 | Functional disturbances following cardiac surgery                         | 1 | H |  |
| 42983 | 0.023045581 | Takotsubo syndrome                                                        | 1 | H |  |
| 7455  | 0.042598319 | Ostium secundum type atrial septal defect                                 | 1 | H |  |
| 7851  | 0.157671603 | Palpitations                                                              | 1 | H |  |
| 78650 | 0.923288135 | Chest pain, unspecified                                                   | 1 | H |  |
| 78651 | 0.100928073 | Precordial pain                                                           | 1 | H |  |
| 78659 | 1.519489914 | Other chest pain                                                          | 1 | H |  |
| 99600 | 0.04310468  | Mechanical complication of unspecified cardiac device, implant, and graft | 1 | H |  |
| 99601 | 0.453928226 | Mechanical complication due to cardiac pacemaker (electrode)              | 1 | H |  |

|       |             |                                                                                      |   |   |  |
|-------|-------------|--------------------------------------------------------------------------------------|---|---|--|
| 99604 | 0.195855863 | Mechanical complication of automatic implantable cardiac defibrillator               | 1 | H |  |
| 99672 | 0.12590532  | Other complications due to other cardiac device, implant, and graft                  | 1 | H |  |
| 9971  | 0.603461292 | Cardiac complications, not elsewhere classified                                      | 1 | H |  |
| V5331 | 0.039334151 | Fitting and adjustment of cardiac pacemaker                                          | 1 | H |  |
| V5332 | 0.048872124 | Fitting and adjustment of automatic implantable cardiac defibrillator                | 1 | H |  |
|       | 4.518072923 |                                                                                      |   |   |  |
| 44020 | 0.013397492 | Atherosclerosis of native arteries of the extremities, unspecified                   | 2 |   |  |
| 44021 | 0.023057559 | Atherosclerosis of native arteries of the extremities with intermittent claudication | 2 |   |  |
| 44024 | 0.045106725 | Atherosclerosis of native arteries of the extremities with gangrene                  | 2 |   |  |
| 44029 | 0.028047767 | Other atherosclerosis of native arteries of the extremities                          | 2 |   |  |
| 4412  | 0.020326126 | Thoracic aneurysm without mention of rupture                                         | 2 |   |  |
| 4413  | 0.024479696 | Abdominal aneurysm, ruptured                                                         | 2 |   |  |
| 4414  | 0.065474007 | Abdominal aneurysm without mention of rupture                                        | 2 |   |  |
| 4420  | 0.017895652 | Aneurysm of artery of upper extremity                                                | 2 |   |  |
| 4423  | 0.284727006 | Aneurysm of artery of lower extremity                                                | 2 |   |  |
| 44289 | 0.023981838 | Aneurysm of other specified artery                                                   | 2 |   |  |
| 44421 | 0.020957239 | Arterial embolism and thrombosis of upper extremity                                  | 2 |   |  |
| 44422 | 0.089583761 | Arterial embolism and thrombosis of lower extremity                                  | 2 |   |  |
| 44489 | 0.035037732 | Embolism and thrombosis of other specified artery                                    | 2 |   |  |
| 4465  | 0.023057559 | Giant cell arteritis                                                                 | 2 |   |  |
| 4470  | 0.182151689 | Arteriovenous fistula, acquired                                                      | 2 |   |  |
| 4510  | 0.021922564 | Phlebitis and thrombophlebitis of superficial vessels of lower extremities           | 2 |   |  |
| 45184 | 0.017840459 | Phlebitis and thrombophlebitis of upper extremities, unspecified                     | 2 |   |  |
| 99674 | 0.028833012 | Other complications due to other vascular device, implant, and graft                 | 2 |   |  |
| 9972  | 1.255313437 | Peripheral vascular complications, not elsewhere classified                          | 2 |   |  |
|       | 2.221191322 |                                                                                      |   |   |  |
| 0380  | 0.136066697 | Streptococcal septicemia                                                             | 3 | A |  |
| 03811 | 0.028966746 | Methicillin susceptible Staphylococcus aureus septicemia                             | 3 | A |  |
| 03812 | 0.154779337 | Methicillin resistant Staphylococcus aureus septicemia                               | 3 | A |  |



|       |             |                                                                                                                           |   |   |  |
|-------|-------------|---------------------------------------------------------------------------------------------------------------------------|---|---|--|
| 0383  | 0.017757387 | Septicemia due to anaerobes                                                                                               | 3 | A |  |
| 03842 | 0.357216436 | Septicemia due to escherichia coli [E. coli]                                                                              | 3 | A |  |
| 03843 | 0.022315896 | Septicemia due to pseudomonas                                                                                             | 3 | A |  |
| 03849 | 0.027947085 | Other septicemia due to gram-negative organisms                                                                           | 3 | A |  |
| 0388  | 0.071670923 | Other specified septicemias                                                                                               | 3 | A |  |
| 0389  | 1.441544859 | Unspecified septicemia                                                                                                    | 3 | A |  |
|       | 2.258265365 |                                                                                                                           |   |   |  |
| 0059  | 0.021390532 | Food poisoning, unspecified                                                                                               | 3 |   |  |
| 00845 | 0.260626307 | Intestinal infection due to Clostridium difficile                                                                         | 3 |   |  |
| 0088  | 0.139796411 | Intestinal infection due to other organism, not elsewhere classified                                                      | 3 |   |  |
| 01194 | 0.026122222 | Pulmonary tuberculosis, unspecified, tubercle bacilli not found (in sputum) by microscopy, but found by bacterial culture | 3 |   |  |
| 01334 | 0.026678743 | Tuberculous abscess of brain, tubercle bacilli not found (in sputum) by microscopy, but found by bacterial culture        | 3 |   |  |
| 042   | 0.028437902 | Human immunodeficiency virus [HIV] disease                                                                                | 3 |   |  |
| 0521  | 0.022704984 | Varicella (hemorrhagic) pneumonitis                                                                                       | 3 |   |  |
| 0539  | 0.032659007 | Herpes zoster without mention of complication                                                                             | 3 |   |  |
| 0543  | 0.02870589  | Herpetic meningoencephalitis                                                                                              | 3 |   |  |
| 0661  | 0.029205856 | Tick-borne fever                                                                                                          | 3 |   |  |
| 0793  | 0.03360116  | Rhinovirus infection in conditions classified elsewhere and of unspecified site                                           | 3 |   |  |
| 07999 | 0.044178219 | Unspecified viral infection                                                                                               | 3 |   |  |
| 1122  | 0.0534164   | Candidiasis of other urogenital sites                                                                                     | 3 |   |  |
| 135   | 0.025148565 | Sarcoidosis                                                                                                               | 3 |   |  |
| 68110 | 0.097798585 | Cellulitis and abscess of toe, unspecified                                                                                | 3 |   |  |
| 6822  | 0.038824707 | Cellulitis and abscess of trunk                                                                                           | 3 |   |  |
| 6823  | 0.055250868 | Cellulitis and abscess of upper arm and forearm                                                                           | 3 |   |  |
| 6824  | 0.046259518 | Cellulitis and abscess of hand, except fingers and thumb                                                                  | 3 |   |  |
| 6826  | 0.428566782 | Cellulitis and abscess of leg, except foot                                                                                | 3 |   |  |
| 6827  | 0.128293092 | Cellulitis and abscess of foot, except toes                                                                               | 3 |   |  |
| 73027 | 0.03360116  | Unspecified osteomyelitis, ankle and foot                                                                                 | 3 |   |  |
| 73028 | 0.020957239 | Unspecified osteomyelitis, other specified sites                                                                          | 3 |   |  |

|       |             |                                                                                                 |   |   |  |
|-------|-------------|-------------------------------------------------------------------------------------------------|---|---|--|
| 7907  | 0.094375165 | Bacteremia                                                                                      | 3 |   |  |
| 99590 | 0.041767526 | Systemic inflammatory response syndrome, unspecified                                            | 3 |   |  |
| 99661 | 0.17338163  | Infection and inflammatory reaction due to cardiac device, implant, and graft                   | 3 |   |  |
| 99664 | 0.234830809 | Infection and inflammatory reaction due to indwelling urinary catheter                          | 3 |   |  |
| 99666 | 0.043854421 | Infection and inflammatory reaction due to internal joint prosthesis                            | 3 |   |  |
| 99667 | 0.022063184 | Infection and inflammatory reaction due to other internal orthopedic device, implant, and graft | 3 |   |  |
| 99859 | 0.321007481 | Other postoperative infection                                                                   | 3 |   |  |
| 99932 | 0.018150387 | Bloodstream infection due to central venous catheter                                            | 3 |   |  |
| 99939 | 0.018150387 | Infection following other infusion, injection, transfusion, or vaccination                      | 3 |   |  |
|       | 2.589805139 |                                                                                                 |   |   |  |
| 51881 | 0.763202778 | Acute respiratory failure                                                                       | 4 | A |  |
| 51884 | 0.250306247 | Acute and chronic respiratory failure                                                           | 4 | A |  |
|       | 1.013509025 |                                                                                                 |   |   |  |
| 4660  | 0.151318822 | Acute bronchitis                                                                                | 4 | B |  |
| 490   | 0.020267879 | Bronchitis, not specified as acute or chronic                                                   | 4 | B |  |
| 4911  | 0.024684601 | Mucopurulent chronic bronchitis                                                                 | 4 | B |  |
| 49120 | 0.039019255 | Obstructive chronic bronchitis without exacerbation                                             | 4 | B |  |
| 49121 | 1.0417203   | Obstructive chronic bronchitis with (acute) exacerbation                                        | 4 | B |  |
| 49122 | 0.229241673 | Obstructive chronic bronchitis with acute bronchitis                                            | 4 | B |  |
| 49322 | 0.491647219 | Chronic obstructive asthma with (acute) exacerbation                                            | 4 | B |  |
| 49390 | 0.022021018 | Asthma, unspecified type, unspecified                                                           | 4 | B |  |
| 49392 | 0.124782816 | Asthma, unspecified type, with (acute) exacerbation                                             | 4 | B |  |
| 4941  | 0.055823606 | Bronchiectasis with acute exacerbation                                                          | 4 | B |  |
|       | 2.20052719  |                                                                                                 |   |   |  |
| 4809  | 0.022010802 | Viral pneumonia, unspecified                                                                    | 4 | C |  |
| 481   | 0.060852068 | Pneumococcal pneumonia [ <i>Streptococcus pneumoniae</i> pneumonia]                             | 4 | C |  |
| 4820  | 0.027645378 | Pneumonia due to <i>Klebsiella pneumoniae</i>                                                   | 4 | C |  |
| 4821  | 0.016968196 | Pneumonia due to <i>Pseudomonas</i>                                                             | 4 | C |  |
| 48230 | 0.020643239 | Pneumonia due to <i>Streptococcus</i> , unspecified                                             | 4 | C |  |

|       |             |                                                                                       |   |   |  |
|-------|-------------|---------------------------------------------------------------------------------------|---|---|--|
| 48242 | 0.143466103 | Methicillin resistant pneumonia due to Staphylococcus aureus                          | 4 | C |  |
| 48282 | 0.022233483 | Pneumonia due to escherichia coli [E. coli]                                           | 4 | C |  |
| 48283 | 0.088907243 | Pneumonia due to other gram-negative bacteria                                         | 4 | C |  |
| 4829  | 0.100730307 | Bacterial pneumonia, unspecified                                                      | 4 | C |  |
| 4830  | 0.026572638 | Pneumonia due to mycoplasma pneumoniae                                                | 4 | C |  |
| 486   | 2.042984744 | Pneumonia, organism unspecified                                                       | 4 | C |  |
| 78652 | 0.113025149 | Painful respiration                                                                   | 4 | C |  |
| 99732 | 0.028118325 | Postprocedural aspiration pneumonia                                                   | 4 | C |  |
|       | 2.714157674 |                                                                                       |   |   |  |
| 32723 | 0.026678743 | Obstructive sleep apnea (adult)(pediatric)                                            | 4 | D |  |
| 4150  | 0.02316971  | Acute cor pulmonale                                                                   | 4 | D |  |
| 4168  | 0.164016134 | Other chronic pulmonary heart diseases                                                | 4 | D |  |
| 4169  | 0.023826119 | Chronic pulmonary heart disease, unspecified                                          | 4 | D |  |
| 4178  | 0.020074971 | Other specified diseases of pulmonary circulation                                     | 4 | D |  |
| 4659  | 0.053196332 | Acute upper respiratory infections of unspecified site                                | 4 | D |  |
| 5070  | 0.541593443 | Pneumonitis due to inhalation of food or vomitus                                      | 4 | D |  |
| 5109  | 0.080316618 | Empyema without mention of fistula                                                    | 4 | D |  |
| 5110  | 0.027006956 | Pleurisy without mention of effusion or current tuberculosis                          | 4 | D |  |
| 51189 | 0.083657233 | Other specified forms of effusion, except tuberculous                                 | 4 | D |  |
| 5119  | 0.371785312 | Unspecified pleural effusion                                                          | 4 | D |  |
| 51289 | 0.01846304  | Other pneumothorax                                                                    | 4 | D |  |
| 5130  | 0.040988001 | Abscess of lung                                                                       | 4 | D |  |
| 514   | 0.037261679 | Pulmonary congestion and hypostasis                                                   | 4 | D |  |
| 515   | 0.01846304  | Postinflammatory pulmonary fibrosis                                                   | 4 | D |  |
| 51633 | 0.020373628 | Acute interstitial pneumonitis                                                        | 4 | D |  |
| 5183  | 0.020074747 | Pulmonary eosinophilia                                                                | 4 | D |  |
| 5184  | 0.175058783 | Acute edema of lung, unspecified                                                      | 4 | D |  |
| 51852 | 0.023789873 | Other pulmonary insufficiency, not elsewhere classified, following trauma and surgery | 4 | D |  |
| 51889 | 0.026642464 | Other diseases of lung, not elsewhere classified                                      | 4 | D |  |
| 5194  | 0.029361994 | Disorders of diaphragm                                                                | 4 | D |  |
| 78605 | 0.089608612 | Shortness of breath                                                                   | 4 | D |  |

|       |             |                                                                           |   |   |  |
|-------|-------------|---------------------------------------------------------------------------|---|---|--|
| 78609 | 0.177222458 | Other respiratory abnormalities                                           | 4 | D |  |
| 7862  | 0.02807022  | Cough                                                                     | 4 | D |  |
| 79902 | 0.040909349 | Hypoxemia                                                                 | 4 | D |  |
| 99739 | 0.199195271 | Other respiratory complications                                           | 4 | D |  |
|       | 2.360804729 |                                                                           |   |   |  |
| 4552  | 0.127390769 | Internal hemorrhoids with other complication                              | 5 |   |  |
| 4555  | 0.022737437 | External hemorrhoids with other complication                              | 5 |   |  |
| 4558  | 0.023045581 | Unspecified hemorrhoids with other complication                           | 5 |   |  |
| 5300  | 0.022328934 | Achalasia and cardiospasm                                                 | 5 |   |  |
| 53010 | 0.024535294 | Esophagitis, unspecified                                                  | 5 |   |  |
| 53020 | 0.024560055 | Ulcer of esophagus without bleeding                                       | 5 |   |  |
| 5305  | 0.022109071 | Dyskinesia of esophagus                                                   | 5 |   |  |
| 53081 | 0.127175746 | Esophageal reflux                                                         | 5 |   |  |
| 53500 | 0.041934774 | Acute gastritis, without mention of hemorrhage                            | 5 |   |  |
| 53540 | 0.031077002 | Other specified gastritis, without mention of hemorrhage                  | 5 |   |  |
| 53550 | 0.055488752 | Unspecified gastritis and gastroduodenitis, without mention of hemorrhage | 5 |   |  |
| 5362  | 0.026433865 | Persistent vomiting                                                       | 5 |   |  |
| 5363  | 0.050281482 | Gastroparesis                                                             | 5 |   |  |
| 53649 | 0.072158129 | Other gastrostomy complications                                           | 5 |   |  |
| 5368  | 0.023655384 | Dyspepsia and other specified disorders of function of stomach            | 5 |   |  |
| 5370  | 0.022063184 | Acquired hypertrophic pyloric stenosis                                    | 5 |   |  |
| 53989 | 0.025148565 | Other complications of other bariatric procedure                          | 5 |   |  |
| 5401  | 0.017938786 | Acute appendicitis with peritoneal abscess                                | 5 |   |  |
| 5409  | 0.06744836  | Acute appendicitis without mention of peritonitis                         | 5 |   |  |
| 5565  | 0.021445482 | Left-sided ulcerative (chronic) colitis                                   | 5 |   |  |
| 5570  | 0.05245093  | Acute vascular insufficiency of intestine                                 | 5 |   |  |
| 5571  | 0.028017117 | Chronic vascular insufficiency of intestine                               | 5 |   |  |
| 5579  | 0.159813863 | Unspecified vascular insufficiency of intestine                           | 5 |   |  |
| 5589  | 0.20132546  | Other and unspecified noninfectious gastroenteritis and colitis           | 5 |   |  |
| 5601  | 0.14115512  | Paralytic ileus                                                           | 5 |   |  |
| 5602  | 0.027482138 | Volvulus                                                                  | 5 |   |  |

|       |             |                                                                                                |   |  |  |
|-------|-------------|------------------------------------------------------------------------------------------------|---|--|--|
| 56031 | 0.023919827 | Gallstone ileus                                                                                | 5 |  |  |
| 56081 | 0.073265999 | Intestinal or peritoneal adhesions with obstruction (postoperative) (postinfection)            | 5 |  |  |
| 56089 | 0.020163643 | Other specified intestinal obstruction                                                         | 5 |  |  |
| 5609  | 0.370408126 | Unspecified intestinal obstruction                                                             | 5 |  |  |
| 56211 | 0.175326626 | Diverticulitis of colon (without mention of hemorrhage)                                        | 5 |  |  |
| 56400 | 0.019088203 | Constipation, unspecified                                                                      | 5 |  |  |
| 5641  | 0.051957152 | Irritable bowel syndrome                                                                       | 5 |  |  |
| 5650  | 0.031334939 | Anal fissure                                                                                   | 5 |  |  |
| 566   | 0.030419047 | Abscess of anal and rectal regions                                                             | 5 |  |  |
| 5680  | 0.024479696 | Peritoneal adhesions (postoperative) (postinfection)                                           | 5 |  |  |
| 5693  | 0.197273043 | Hemorrhage of rectum and anus                                                                  | 5 |  |  |
| 56949 | 0.035084099 | Other specified disorders of rectum and anus                                                   | 5 |  |  |
| 5711  | 0.021843967 | Acute alcoholic hepatitis                                                                      | 5 |  |  |
| 5712  | 0.028047767 | Alcoholic cirrhosis of liver                                                                   | 5 |  |  |
| 5715  | 0.02807022  | Cirrhosis of liver without mention of alcohol                                                  | 5 |  |  |
| 5722  | 0.068355161 | Hepatic encephalopathy                                                                         | 5 |  |  |
| 5724  | 0.044807052 | Hepatorenal syndrome                                                                           | 5 |  |  |
| 5728  | 0.035266334 | Other sequelae of chronic liver disease                                                        | 5 |  |  |
| 57400 | 0.300451766 | Calculus of gallbladder with acute cholecystitis, without mention of obstruction               | 5 |  |  |
| 57410 | 0.072650562 | Calculus of gallbladder with other cholecystitis, without mention of obstruction               | 5 |  |  |
| 57420 | 0.116658862 | Calculus of gallbladder without mention of cholecystitis, without mention of obstruction       | 5 |  |  |
| 57470 | 0.022021018 | Calculus of gallbladder and bile duct with other cholecystitis, without mention of obstruction | 5 |  |  |
| 57471 | 0.038747188 | Calculus of gallbladder and bile duct with other cholecystitis, with obstruction               | 5 |  |  |
| 5750  | 0.019088559 | Acute cholecystitis                                                                            | 5 |  |  |
| 57511 | 0.056099578 | Chronic cholecystitis                                                                          | 5 |  |  |
| 57512 | 0.027898063 | Acute and chronic cholecystitis                                                                | 5 |  |  |

|       |             |                                                                                 |   |   |  |
|-------|-------------|---------------------------------------------------------------------------------|---|---|--|
| 5761  | 0.057820231 | Cholangitis                                                                     | 5 |   |  |
| 5768  | 0.018083929 | Other specified disorders of biliary tract                                      | 5 |   |  |
| 5770  | 0.200076022 | Acute pancreatitis                                                              | 5 |   |  |
| 5772  | 0.02419763  | Cyst and pseudocyst of pancreas                                                 | 5 |   |  |
| 78701 | 0.157341961 | Nausea with vomiting                                                            | 5 |   |  |
| 78720 | 0.022481685 | Dysphagia, unspecified                                                          | 5 |   |  |
| 78900 | 0.137975585 | Abdominal pain, unspecified site                                                | 5 |   |  |
| 78901 | 0.030904698 | Abdominal pain, right upper quadrant                                            | 5 |   |  |
| 78902 | 0.02055134  | Abdominal pain, left upper quadrant                                             | 5 |   |  |
| 78903 | 0.027033107 | Abdominal pain, right lower quadrant                                            | 5 |   |  |
| 78906 | 0.080481626 | Abdominal pain, epigastric                                                      | 5 |   |  |
| 78907 | 0.021333622 | Abdominal pain, generalized                                                     | 5 |   |  |
| 78909 | 0.022906986 | Abdominal pain, other specified site                                            | 5 |   |  |
| 9974  | 0.065839732 | Digestive system complications not elsewhere classified                         | 5 |   |  |
|       | 4.27895593  |                                                                                 |   |   |  |
| 43310 | 0.088495449 | Occlusion and stenosis of carotid artery without mention of cerebral infarction | 6 | A |  |
| 43311 | 0.020127765 | Occlusion and stenosis of carotid artery with cerebral infarction               | 6 | A |  |
| 43400 | 0.019990596 | Cerebral thrombosis without mention of cerebral infarction                      | 6 | A |  |
| 43411 | 0.268359186 | Cerebral embolism with cerebral infarction                                      | 6 | A |  |
| 43490 | 0.031297694 | Cerebral artery occlusion, unspecified without mention of cerebral infarction   | 6 | A |  |
| 43491 | 0.599008419 | Cerebral artery occlusion, unspecified with cerebral infarction                 | 6 | A |  |
| 4358  | 0.024059479 | Other specified transient cerebral ischemias                                    | 6 | A |  |
| 4359  | 0.497080041 | Unspecified transient cerebral ischemia                                         | 6 | A |  |
| 4370  | 0.023644182 | Cerebral atherosclerosis                                                        | 6 | A |  |
| 4371  | 0.017411889 | Other generalized ischemic cerebrovascular disease                              | 6 | A |  |
|       | 1.589474699 |                                                                                 |   |   |  |
| 3310  | 0.028978913 | Alzheimer's disease                                                             | 6 | B |  |
| 3315  | 0.046496917 | Idiopathic normal pressure hydrocephalus (INPH)                                 | 6 | B |  |
| 33182 | 0.018677599 | Dementia with lewy bodies                                                       | 6 | B |  |
| 33812 | 0.028437902 | Acute post-thoracotomy pain                                                     | 6 | B |  |

|       |             |                                                                                                                                                |   |   |  |
|-------|-------------|------------------------------------------------------------------------------------------------------------------------------------------------|---|---|--|
| 33818 | 0.042065329 | Other acute postoperative pain                                                                                                                 | 6 | B |  |
| 33819 | 0.020267879 | Other acute pain                                                                                                                               | 6 | B |  |
| 3383  | 0.059194279 | Neoplasm related pain (acute) (chronic)                                                                                                        | 6 | B |  |
| 3384  | 0.022015514 | Chronic pain syndrome                                                                                                                          | 6 | B |  |
| 34460 | 0.022260707 | Cauda equina syndrome without mention of neurogenic bladder                                                                                    | 6 | B |  |
| 3453  | 0.021839017 | Grand mal status                                                                                                                               | 6 | B |  |
| 34540 | 0.027645378 | Localization-related (focal) (partial) epilepsy and epileptic syndromes with complex partial seizures, without mention of intractable epilepsy | 6 | B |  |
| 34580 | 0.048763783 | Other forms of epilepsy and recurrent seizures, without mention of intractable epilepsy                                                        | 6 | B |  |
| 34590 | 0.053359517 | Epilepsy, unspecified, without mention of intractable epilepsy                                                                                 | 6 | B |  |
| 34670 | 0.038757833 | Chronic migraine without aura, without mention of intractable migraine without mention of status migrainosus                                   | 6 | B |  |
| 34680 | 0.048682552 | Other forms of migraine, without mention of intractable migraine without mention of status migrainosus                                         | 6 | B |  |
| 34690 | 0.049047782 | Migraine, unspecified, without mention of intractable migraine without mention of status migrainosus                                           | 6 | B |  |
| 34691 | 0.062629077 | Migraine, unspecified, with intractable migraine, so stated, without mention of status migrainosus                                             | 6 | B |  |
| 3481  | 0.050849013 | Anoxic brain damage                                                                                                                            | 6 | B |  |
| 34830 | 0.027033107 | Encephalopathy, unspecified                                                                                                                    | 6 | B |  |
| 34831 | 0.016985689 | Metabolic encephalopathy                                                                                                                       | 6 | B |  |
| 34839 | 0.067357802 | Other encephalopathy                                                                                                                           | 6 | B |  |
| 34982 | 0.022548665 | Toxic encephalopathy                                                                                                                           | 6 | B |  |
| 3558  | 0.03286126  | Mononeuritis of lower limb, unspecified                                                                                                        | 6 | B |  |
| 3569  | 0.023625621 | Unspecified hereditary and idiopathic peripheral neuropathy                                                                                    | 6 | B |  |
| 3576  | 0.028833012 | Polyneuropathy due to drugs                                                                                                                    | 6 | B |  |
| 35801 | 0.021697145 | Myasthenia gravis with (acute) exacerbation                                                                                                    | 6 | B |  |
| 35979 | 0.022109071 | Other inflammatory and immune myopathies, NEC                                                                                                  | 6 | B |  |
| 37739 | 0.024841249 | Other optic neuritis                                                                                                                           | 6 | B |  |
| 4373  | 0.035084099 | Cerebral aneurysm, nonruptured                                                                                                                 | 6 | B |  |
| 4377  | 0.021922564 | Transient global amnesia                                                                                                                       | 6 | B |  |

|       |             |                                                                                                                        |   |   |  |
|-------|-------------|------------------------------------------------------------------------------------------------------------------------|---|---|--|
| 4378  | 0.025720216 | Other ill-defined cerebrovascular disease                                                                              | 6 | B |  |
| 78009 | 0.01876572  | Other alteration of consciousness                                                                                      | 6 | B |  |
| 78093 | 0.022867323 | Memory loss                                                                                                            | 6 | B |  |
| 7820  | 0.030492612 | Disturbance of skin sensation                                                                                          | 6 | B |  |
| 7840  | 0.047636804 | Headache                                                                                                               | 6 | B |  |
| 7843  | 0.03315395  | Aphasia                                                                                                                | 6 | B |  |
|       | 1.213504901 |                                                                                                                        |   |   |  |
| 2760  | 0.017572024 | Hyperosmolality and/or hypernatremia                                                                                   | 7 | A |  |
| 2761  | 0.618521898 | Hyposmolality and/or hyponatremia                                                                                      | 7 | A |  |
| 2767  | 0.079441526 | Hyperpotassemia                                                                                                        | 7 | A |  |
| 2768  | 0.074592572 | Hypopotassemia                                                                                                         | 7 | A |  |
|       | 0.790128019 |                                                                                                                        |   |   |  |
| 5845  | 0.08044266  | Acute kidney failure with lesion of tubular necrosis                                                                   | 7 | B |  |
| 5849  | 1.208624685 | Acute kidney failure, unspecified                                                                                      | 7 | B |  |
| 5856  | 0.058234241 | End stage renal disease                                                                                                | 7 | B |  |
| 40300 | 0.027033107 | Hypertensive chronic kidney disease, malignant, with chronic kidney disease stage I through stage IV, or unspecified   | 7 | B |  |
| 40390 | 0.068677231 | Hypertensive chronic kidney disease, unspecified, with chronic kidney disease stage I through stage IV, or unspecified | 7 | B |  |
| 40391 | 0.068788567 | Hypertensive chronic kidney disease, unspecified, with chronic kidney disease stage V or end stage renal disease       | 7 | B |  |
|       | 1.51180049  |                                                                                                                        |   |   |  |
| 59000 | 0.022439692 | Chronic pyelonephritis without lesion of renal medullary necrosis                                                      | 7 | C |  |
| 59080 | 0.022546188 | Pyelonephritis, unspecified                                                                                            | 7 | C |  |
| 5921  | 0.150934329 | Calculus of ureter                                                                                                     | 7 | C |  |
| 5939  | 0.024841249 | Unspecified disorder of kidney and ureter                                                                              | 7 | C |  |
| 59582 | 0.022328934 | Irradiation cystitis                                                                                                   | 7 | C |  |
| 5960  | 0.077217066 | Bladder neck obstruction                                                                                               | 7 | C |  |
| 5990  | 0.606997487 | Urinary tract infection, site not specified                                                                            | 7 | C |  |
| 60000 | 0.061018588 | Hypertrophy (benign) of prostate without urinary obstruction and other lower urinary tract symptom (LUTS)              | 7 | C |  |



|       |             |                                                                                                         |   |   |  |
|-------|-------------|---------------------------------------------------------------------------------------------------------|---|---|--|
| 60001 | 0.097537179 | Hypertrophy (benign) of prostate with urinary obstruction and other lower urinary tract symptoms (LUTS) | 7 | C |  |
| 6010  | 0.041476277 | Acute prostatitis                                                                                       | 7 | C |  |
| 78899 | 0.020603697 | Other symptoms involving urinary system                                                                 | 7 | C |  |
| 99631 | 0.097220731 | Mechanical complication due to urethral (indwelling) catheter                                           | 7 | C |  |
| 99673 | 0.060186504 | Other complications due to renal dialysis device, implant, and graft                                    | 7 | C |  |
| 99676 | 0.063223801 | Other complications due to genitourinary device, implant, and graft                                     | 7 | C |  |
| 99681 | 0.027080134 | Complications of transplanted kidney                                                                    | 7 | C |  |
| 9975  | 0.04171593  | Urinary complications, not elsewhere classified                                                         | 7 | C |  |
|       | 1.437367786 |                                                                                                         |   |   |  |
| 2809  | 0.048661546 | Iron deficiency anemia, unspecified                                                                     | 8 | A |  |
| 28319 | 0.026122222 | Other non-autoimmune hemolytic anemias                                                                  | 8 | A |  |
| 28521 | 0.044202269 | Anemia in chronic kidney disease                                                                        | 8 | A |  |
| 28522 | 0.022906986 | Anemia in neoplastic disease                                                                            | 8 | A |  |
| 28529 | 0.032584921 | Anemia of other chronic disease                                                                         | 8 | A |  |
| 2859  | 0.072865218 | Anemia, unspecified                                                                                     | 8 | A |  |
|       | 0.247343161 |                                                                                                         |   |   |  |
| 28659 | 0.024965659 | Other hemorrhagic disorder due to intrinsic circulating anticoagulants, antibodies, or inhibitors       | 8 | B |  |
| 28804 | 0.033149204 | Neutropenia due to infection                                                                            | 8 | B |  |
| 28981 | 0.020603697 | Primary hypercoagulable state                                                                           | 8 | B |  |
| 79092 | 0.173758035 | Abnormal coagulation profile                                                                            | 8 | B |  |
|       | 0.252476595 |                                                                                                         |   |   |  |
| 73382 | 0.017425632 | Nonunion of fracture                                                                                    | 9 |   |  |
| 8020  | 0.040446576 | Closed fracture of nasal bones                                                                          | 9 |   |  |
| 80505 | 0.027033107 | Closed fracture of fifth cervical vertebra                                                              | 9 |   |  |
| 8052  | 0.0404249   | Closed fracture of dorsal [thoracic] vertebra without mention of spinal cord injury                     | 9 |   |  |
| 8056  | 0.045625187 | Closed fracture of sacrum and coccyx without mention of spinal cord injury                              | 9 |   |  |
| 80702 | 0.02058344  | Closed fracture of two ribs                                                                             | 9 |   |  |
| 80703 | 0.021385729 | Closed fracture of three ribs                                                                           | 9 |   |  |

|       |             |                                                                                                                                    |   |  |  |
|-------|-------------|------------------------------------------------------------------------------------------------------------------------------------|---|--|--|
| 80705 | 0.028267075 | Closed fracture of five ribs                                                                                                       | 9 |  |  |
| 8082  | 0.01988548  | Closed fracture of pubis                                                                                                           | 9 |  |  |
| 81241 | 0.027967953 | Closed supracondylar fracture of humerus                                                                                           | 9 |  |  |
| 82003 | 0.01988548  | Closed fracture of base of neck of femur                                                                                           | 9 |  |  |
| 82009 | 0.133395741 | Other closed transcervical fracture of neck of femur                                                                               | 9 |  |  |
| 82021 | 0.075722232 | Closed fracture of intertrochanteric section of neck of femur                                                                      | 9 |  |  |
| 8208  | 0.062935123 | Closed fracture of unspecified part of neck of femur                                                                               | 9 |  |  |
| 8244  | 0.051739031 | Bimalleolar fracture, closed                                                                                                       | 9 |  |  |
| 8246  | 0.019409379 | Trimalleolar fracture, closed                                                                                                      | 9 |  |  |
| 8250  | 0.02058344  | Fracture of calcaneus, closed                                                                                                      | 9 |  |  |
| 82535 | 0.021390532 | Open fracture of metatarsal bone(s)                                                                                                | 9 |  |  |
| 85011 | 0.025720216 | Concussion, with loss of consciousness of 30 minutes or less                                                                       | 9 |  |  |
| 85181 | 0.022015514 | Other and unspecified cerebral laceration and contusion, without mention of open intracranial wound, with no loss of consciousness | 9 |  |  |
| 8604  | 0.021697145 | Traumatic pneumothorax without mention of open wound into thorax                                                                   | 9 |  |  |
| 86504 | 0.028150632 | Injury to spleen without mention of open wound into cavity, massive parenchymal disruption                                         | 9 |  |  |
| 8670  | 0.102836536 | Injury to bladder and urethra, without mention of open wound into cavity                                                           | 9 |  |  |
| 87211 | 0.022233483 | Open wound of auricle, ear, complicated                                                                                            | 9 |  |  |
| 8782  | 0.023625621 | Open wound of scrotum and testes, without mention of complication                                                                  | 9 |  |  |
| 8911  | 0.030590997 | Open wound of knee, leg [except thigh], and ankle, complicated                                                                     | 9 |  |  |
| 9222  | 0.022481685 | Contusion of abdominal wall                                                                                                        | 9 |  |  |
| 9245  | 0.017401496 | Contusion of unspecified part of lower limb                                                                                        | 9 |  |  |
| 9551  | 0.027080134 | Injury to median nerve                                                                                                             | 9 |  |  |
| 95901 | 0.025148565 | Head injury, unspecified                                                                                                           | 9 |  |  |
| 9623  | 0.079011304 | Poisoning by insulins and antidiabetic agents                                                                                      | 9 |  |  |
| 9642  | 0.02697595  | Poisoning by anticoagulants                                                                                                        | 9 |  |  |
| 96509 | 0.021333622 | Poisoning by other opiates and related narcotics                                                                                   | 9 |  |  |
|       | 1.190408935 |                                                                                                                                    |   |  |  |

|       |             |                                                                                                         |    |   |  |
|-------|-------------|---------------------------------------------------------------------------------------------------------|----|---|--|
| 25002 | 0.035084099 | Diabetes mellitus without mention of complication, type II or unspecified type, uncontrolled            | 10 | A |  |
| 25012 | 0.022772836 | Diabetes with ketoacidosis, type II or unspecified type, uncontrolled                                   | 10 | A |  |
| 25060 | 0.110178154 | Diabetes with neurological manifestations, type II or unspecified type, not stated as uncontrolled      | 10 | A |  |
| 25062 | 0.028097767 | Diabetes with neurological manifestations, type II or unspecified type, uncontrolled                    | 10 | A |  |
| 25070 | 0.038490504 | Diabetes with peripheral circulatory disorders, type II or unspecified type, not stated as uncontrolled | 10 | A |  |
| 25080 | 0.136826709 | Diabetes with other specified manifestations, type II or unspecified type, not stated as uncontrolled   | 10 | A |  |
|       | 0.371450069 |                                                                                                         |    |   |  |
| 2410  | 0.02407807  | Nontoxic uninodular goiter                                                                              | 10 | B |  |
| 2411  | 0.027645378 | Nontoxic multinodular goiter                                                                            | 10 | B |  |
| 2449  | 0.051521779 | Unspecified acquired hypothyroidism                                                                     | 10 | B |  |
| 2536  | 0.109000037 | Other disorders of neurohypophysis                                                                      | 10 | B |  |
|       | 0.212245263 |                                                                                                         |    |   |  |
| 1531  | 0.017633684 | Malignant neoplasm of transverse colon                                                                  | 11 |   |  |
| 1532  | 0.025811039 | Malignant neoplasm of descending colon                                                                  | 11 |   |  |
| 1533  | 0.022391323 | Malignant neoplasm of sigmoid colon                                                                     | 11 |   |  |
| 1536  | 0.019088559 | Malignant neoplasm of ascending colon                                                                   | 11 |   |  |
| 1539  | 0.024902132 | Malignant neoplasm of colon, unspecified site                                                           | 11 |   |  |
| 1540  | 0.030720259 | Malignant neoplasm of rectosigmoid junction                                                             | 11 |   |  |
| 1548  | 0.018853593 | Malignant neoplasm of other sites of rectum, rectosigmoid junction, and anus                            | 11 |   |  |
| 1571  | 0.030959489 | Malignant neoplasm of body of pancreas                                                                  | 11 |   |  |
| 1579  | 0.020830611 | Malignant neoplasm of pancreas, part unspecified                                                        | 11 |   |  |
| 1622  | 0.048989242 | Malignant neoplasm of main bronchus                                                                     | 11 |   |  |
| 1623  | 0.114431349 | Malignant neoplasm of upper lobe, bronchus or lung                                                      | 11 |   |  |
| 1625  | 0.02419763  | Malignant neoplasm of lower lobe, bronchus or lung                                                      | 11 |   |  |
| 1628  | 0.02267155  | Malignant neoplasm of other parts of bronchus or lung                                                   | 11 |   |  |
| 1629  | 0.180118502 | Malignant neoplasm of bronchus and lung, unspecified                                                    | 11 |   |  |

|       |             |                                                                                       |    |   |  |
|-------|-------------|---------------------------------------------------------------------------------------|----|---|--|
| 1759  | 0.026122222 | Malignant neoplasm of other and unspecified sites of male breast                      | 11 |   |  |
| 1888  | 0.027080134 | Malignant neoplasm of other specified sites of bladder                                | 11 |   |  |
| 1889  | 0.027967953 | Malignant neoplasm of bladder, part unspecified                                       | 11 |   |  |
| 1890  | 0.085882059 | Malignant neoplasm of kidney, except pelvis                                           | 11 |   |  |
| 1960  | 0.026642464 | Secondary and unspecified malignant neoplasm of lymph nodes of head, face, and neck   | 11 |   |  |
| 1970  | 0.028047767 | Secondary malignant neoplasm of lung                                                  | 11 |   |  |
| 1972  | 0.030414229 | Secondary malignant neoplasm of pleura                                                | 11 |   |  |
| 1976  | 0.027809986 | Secondary malignant neoplasm of retroperitoneum and peritoneum                        | 11 |   |  |
| 1983  | 0.042874017 | Secondary malignant neoplasm of brain and spinal cord                                 | 11 |   |  |
| 1985  | 0.022391323 | Secondary malignant neoplasm of bone and bone marrow                                  | 11 |   |  |
| 20288 | 0.039591643 | Other malignant lymphomas, lymph nodes of multiple sites                              | 11 |   |  |
| 20300 | 0.062910565 | Multiple myeloma, without mention of having achieved remission                        | 11 |   |  |
| 2111  | 0.026549563 | Benign neoplasm of stomach                                                            | 11 |   |  |
| 2113  | 0.019631546 | Benign neoplasm of colon                                                              | 11 |   |  |
| 2124  | 0.020730647 | Benign neoplasm of pleura                                                             | 11 |   |  |
| 2126  | 0.022546188 | Benign neoplasm of thymus                                                             | 11 |   |  |
| 220   | 0.052912046 | Benign neoplasm of ovary                                                              | 11 |   |  |
| 2396  | 0.016996711 | Neoplasm of unspecified nature of brain                                               | 11 |   |  |
|       | 1.208700022 |                                                                                       |    |   |  |
| 5307  | 0.028519382 | Gastroesophageal laceration-hemorrhage syndrome                                       | 12 | A |  |
| 53100 | 0.029560214 | Acute gastric ulcer with hemorrhage, without mention of obstruction                   | 12 | A |  |
| 53140 | 0.070234984 | Chronic or unspecified gastric ulcer with hemorrhage, without mention of obstruction  | 12 | A |  |
| 53240 | 0.047230789 | Chronic or unspecified duodenal ulcer with hemorrhage, without mention of obstruction | 12 | A |  |
| 53541 | 0.146609817 | Other specified gastritis, with hemorrhage                                            | 12 | A |  |
| 53551 | 0.057966912 | Unspecified gastritis and gastroduodenitis, with hemorrhage                           | 12 | A |  |
| 53783 | 0.056089196 | Angiodysplasia of stomach and duodenum with hemorrhage                                | 12 | A |  |
| 56212 | 0.116654317 | Diverticulosis of colon with hemorrhage                                               | 12 | A |  |
| 56213 | 0.042188399 | Diverticulitis of colon with hemorrhage                                               | 12 | A |  |
| 56881 | 0.054450983 | Hemoperitoneum (nontraumatic)                                                         | 12 | A |  |

|       |             |                                                                                                                                                                         |    |   |    |
|-------|-------------|-------------------------------------------------------------------------------------------------------------------------------------------------------------------------|----|---|----|
| 56985 | 0.053856857 | Angiodysplasia of intestine with hemorrhage                                                                                                                             | 12 | A |    |
| 56986 | 0.022546188 | Dieulafoy lesion (hemorrhagic) of intestine                                                                                                                             | 12 | A |    |
| 5780  | 0.027921217 | Hematemesis                                                                                                                                                             | 12 | A |    |
| 5781  | 0.236099113 | Blood in stool                                                                                                                                                          | 12 | A |    |
| 5789  | 0.743949585 | Hemorrhage of gastrointestinal tract, unspecified                                                                                                                       | 12 | A |    |
|       | 1.733877952 |                                                                                                                                                                         |    |   |    |
| 430   | 0.033167995 | Subarachnoid hemorrhage                                                                                                                                                 | 12 | B | I  |
| 431   | 0.16797725  | Intracerebral hemorrhage                                                                                                                                                | 12 | B | I  |
| 4321  | 0.154745776 | Subdural hemorrhage                                                                                                                                                     | 12 | B | I  |
| 4329  | 0.032374601 | Unspecified intracranial hemorrhage                                                                                                                                     | 12 | B | I  |
|       | 0.388265622 |                                                                                                                                                                         |    |   |    |
| 80021 | 0.024841249 | Closed fracture of vault of skull with subarachnoid, subdural, and extradural hemorrhage, with no loss of consciousness                                                 | 12 | B | II |
| 80422 | 0.022896283 | Closed fractures involving skull or face with other bones with subarachnoid, subdural, and extradural hemorrhage, with brief [less than one hour] loss of consciousness | 12 | B | II |
| 85220 | 0.025311751 | Subdural hemorrhage following injury without mention of open intracranial wound, unspecified state of consciousness                                                     | 12 | B | II |
| 85221 | 0.025148565 | Subdural hemorrhage following injury without mention of open intracranial wound, with no loss of consciousness                                                          | 12 | B | II |
| 85226 | 0.01846304  | Subdural hemorrhage following injury without mention of open intracranial wound, with loss of consciousness of unspecified duration                                     | 12 | B | II |
| 85300 | 0.044066949 | Other and unspecified intracranial hemorrhage following injury without mention of open intracranial wound, unspecified state of consciousness                           | 12 | B | II |
| 85301 | 0.01845534  | Other and unspecified intracranial hemorrhage following injury without mention of open intracranial wound, with no loss of consciousness                                | 12 | B | II |
| 85306 | 0.020023381 | Other and unspecified intracranial hemorrhage following injury without mention of open intracranial wound, with loss of consciousness of unspecified duration           | 12 | B | II |
|       | 0.199206558 |                                                                                                                                                                         |    |   |    |
| 2800  | 0.072612625 | Iron deficiency anemia secondary to blood loss (chronic)                                                                                                                | 12 | C |    |

|       |             |                                                                                                          |    |   |  |
|-------|-------------|----------------------------------------------------------------------------------------------------------|----|---|--|
| 2851  | 0.262599305 | Acute posthemorrhagic anemia                                                                             | 12 | C |  |
| 4590  | 0.027396812 | Hemorrhage, unspecified                                                                                  | 12 | C |  |
| 59970 | 0.016968196 | Hematuria, unspecified                                                                                   | 12 | C |  |
| 59971 | 0.174931325 | Gross hematuria                                                                                          | 12 | C |  |
| 7847  | 0.022704984 | Epistaxis                                                                                                | 12 | C |  |
| 78630 | 0.050112669 | Hemoptysis, unspecified                                                                                  | 12 | C |  |
| 78639 | 0.024981634 | Other hemoptysis                                                                                         | 12 | C |  |
| 99811 | 0.223271551 | Hemorrhage complicating a procedure                                                                      | 12 | C |  |
| 99812 | 1.831456517 | Hematoma complicating a procedure                                                                        | 12 | C |  |
|       | 2.707035616 |                                                                                                          |    |   |  |
| 2910  | 0.051087881 | Alcohol withdrawal delirium                                                                              | 13 |   |  |
| 29181 | 0.023826119 | Alcohol withdrawal                                                                                       | 13 |   |  |
| 2920  | 0.04319292  | Drug withdrawal                                                                                          | 13 |   |  |
| 29281 | 0.021333622 | Drug-induced delirium                                                                                    | 13 |   |  |
| 29572 | 0.013568769 | Schizoaffective disorder, chronic                                                                        | 13 |   |  |
| 29620 | 0.043276318 | Major depressive affective disorder, single episode, unspecified                                         | 13 |   |  |
| 29630 | 0.101900782 | Major depressive affective disorder, recurrent episode, unspecified                                      | 13 |   |  |
| 29632 | 0.021842885 | Major depressive affective disorder, recurrent episode, moderate                                         | 13 |   |  |
| 29633 | 0.042916067 | Major depressive affective disorder, recurrent episode, severe, without mention of psychotic behavior    | 13 |   |  |
| 29636 | 0.016440641 | Major depressive affective disorder, recurrent episode, in full remission                                | 13 |   |  |
| 29644 | 0.02058344  | Bipolar I disorder, most recent episode (or current) manic, severe, specified as with psychotic behavior | 13 |   |  |
| 29650 | 0.038961542 | Bipolar I disorder, most recent episode (or current) depressed, unspecified                              | 13 |   |  |
| 2989  | 0.020926464 | Unspecified psychosis                                                                                    | 13 |   |  |
| 30000 | 0.025009291 | Anxiety state, unspecified                                                                               | 13 |   |  |
| 30011 | 0.020221174 | Conversion disorder                                                                                      | 13 |   |  |
| 3004  | 0.065824229 | Dysthymic disorder                                                                                       | 13 |   |  |
| 30300 | 0.034044804 | Acute alcoholic intoxication in alcoholism, unspecified                                                  | 13 |   |  |
| 30390 | 0.024965659 | Other and unspecified alcohol dependence, unspecified                                                    | 13 |   |  |

|       |             |                                                                                         |    |  |  |
|-------|-------------|-----------------------------------------------------------------------------------------|----|--|--|
| 30590 | 0.023625621 | Other, mixed, or unspecified drug abuse, unspecified                                    | 13 |  |  |
| 3064  | 0.018322701 | Gastrointestinal malfunction arising from mental factors                                | 13 |  |  |
|       | 0.67187093  |                                                                                         |    |  |  |
| 41511 | 0.108749282 | Iatrogenic pulmonary embolism and infarction                                            | 14 |  |  |
| 41519 | 0.462288025 | Other pulmonary embolism and infarction                                                 | 14 |  |  |
| 45340 | 0.121795006 | Acute venous embolism and thrombosis of unspecified deep vessels of lower extremity     | 14 |  |  |
| 45341 | 0.323547821 | Acute venous embolism and thrombosis of deep vessels of proximal lower extremity        | 14 |  |  |
| 45381 | 0.023451559 | Acute venous embolism and thrombosis of superficial veins of upper extremity            | 14 |  |  |
| 45382 | 0.026557052 | Acute venous embolism and thrombosis of deep veins of upper extremity                   | 14 |  |  |
|       | 1.066388745 |                                                                                         |    |  |  |
| 27400 | 0.04376019  | Gouty arthropathy, unspecified                                                          | 15 |  |  |
| 27651 | 0.17104001  | Dehydration                                                                             | 15 |  |  |
| 27652 | 0.046370468 | Hypovolemia                                                                             | 15 |  |  |
| 27661 | 0.03315395  | Transfusion associated circulatory overload                                             | 15 |  |  |
| 27669 | 0.159489416 | Other fluid overload                                                                    | 15 |  |  |
| 2779  | 0.030982357 | Unspecified disorder of metabolism                                                      | 15 |  |  |
| 3693  | 0.031783037 | Unqualified visual loss, both eyes                                                      | 15 |  |  |
| 38610 | 0.013368982 | Peripheral vertigo, unspecified                                                         | 15 |  |  |
| 38611 | 0.043425706 | Benign paroxysmal positional vertigo                                                    | 15 |  |  |
| 4568  | 0.018945362 | Varices of other sites                                                                  | 15 |  |  |
| 55200 | 0.020150896 | Femoral hernia with obstruction, unilateral or unspecified (not specified as recurrent) | 15 |  |  |
| 55221 | 0.02407807  | Incisional ventral hernia with obstruction                                              | 15 |  |  |
| 5523  | 0.030982357 | Diaphragmatic hernia with obstruction                                                   | 15 |  |  |
| 55329 | 0.026642464 | Other ventral hernia without mention of obstruction or gangrene                         | 15 |  |  |
| 6185  | 0.019328702 | Prolapse of vaginal vault after hysterectomy                                            | 15 |  |  |
| 6273  | 0.027645378 | Postmenopausal atrophic vaginitis                                                       | 15 |  |  |
| 6861  | 0.022109071 | Pyogenic granuloma of skin and subcutaneous tissue                                      | 15 |  |  |

|       |             |                                                                                                |    |  |  |
|-------|-------------|------------------------------------------------------------------------------------------------|----|--|--|
| 70714 | 0.024981634 | Ulcer of heel and midfoot                                                                      | 15 |  |  |
| 70719 | 0.017974973 | Ulcer of other part of lower limb                                                              | 15 |  |  |
| 7092  | 0.024706975 | Scar conditions and fibrosis of skin                                                           | 15 |  |  |
| 7093  | 0.021922564 | Degenerative skin disorders                                                                    | 15 |  |  |
| 7098  | 0.022190336 | Other specified disorders of skin                                                              | 15 |  |  |
| 7140  | 0.027033107 | Rheumatoid arthritis                                                                           | 15 |  |  |
| 71516 | 0.114913868 | Osteoarthritis, localized, primary, lower leg                                                  | 15 |  |  |
| 71535 | 0.193021903 | Osteoarthritis, localized, not specified whether primary or secondary, pelvic region and thigh | 15 |  |  |
| 71536 | 0.266786043 | Osteoarthritis, localized, not specified whether primary or secondary, lower leg               | 15 |  |  |
| 71538 | 0.02573498  | Osteoarthritis, localized, not specified whether primary or secondary, other specified sites   | 15 |  |  |
| 71595 | 0.048739899 | Osteoarthritis, unspecified whether generalized or localized, pelvic region and thigh          | 15 |  |  |
| 71596 | 0.17940187  | Osteoarthritis, unspecified whether generalized or localized, lower leg                        | 15 |  |  |
| 71617 | 0.028437902 | Traumatic arthropathy, ankle and foot                                                          | 15 |  |  |
| 71681 | 0.022328934 | Other specified arthropathy, shoulder region                                                   | 15 |  |  |
| 71941 | 0.032685594 | Pain in joint, shoulder region                                                                 | 15 |  |  |
| 7210  | 0.18596623  | Cervical spondylosis without myelopathy                                                        | 15 |  |  |
| 7211  | 0.066076362 | Cervical spondylosis with myelopathy                                                           | 15 |  |  |
| 7213  | 0.01968791  | Lumbosacral spondylosis without myelopathy                                                     | 15 |  |  |
| 72210 | 0.042666674 | Displacement of lumbar intervertebral disc without myelopathy                                  | 15 |  |  |
| 72252 | 0.072767557 | Degeneration of lumbar or lumbosacral intervertebral disc                                      | 15 |  |  |
| 72400 | 0.024706975 | Spinal stenosis, unspecified region                                                            | 15 |  |  |
| 72402 | 0.087572454 | Spinal stenosis, lumbar region, without neurogenic claudication                                | 15 |  |  |
| 72403 | 0.022403526 | Spinal stenosis, lumbar region, with neurogenic claudication                                   | 15 |  |  |
| 7242  | 0.022755136 | Lumbago                                                                                        | 15 |  |  |
| 7244  | 0.026642464 | Thoracic or lumbosacral neuritis or radiculitis, unspecified                                   | 15 |  |  |
| 7245  | 0.022546188 | Backache, unspecified                                                                          | 15 |  |  |
| 7262  | 0.040446576 | Other affections of shoulder region, not elsewhere classified                                  | 15 |  |  |



|       |             |                                                                                            |    |  |  |
|-------|-------------|--------------------------------------------------------------------------------------------|----|--|--|
| 72705 | 0.017633684 | Other tenosynovitis of hand and wrist                                                      | 15 |  |  |
| 72886 | 0.026433865 | Necrotizing fasciitis                                                                      | 15 |  |  |
| 72889 | 0.057660293 | Other disorders of muscle, ligament, and fascia                                            | 15 |  |  |
| 7292  | 0.023184161 | Neuralgia, neuritis, and radiculitis, unspecified                                          | 15 |  |  |
| 72989 | 0.038317641 | Other musculoskeletal symptoms referable to limbs                                          | 15 |  |  |
| 72992 | 0.092794399 | Nontraumatic hematoma of soft tissue                                                       | 15 |  |  |
| 7336  | 0.064255409 | Tietze's disease                                                                           | 15 |  |  |
| 73679 | 0.02491092  | Other acquired deformities of ankle and foot                                               | 15 |  |  |
| 7384  | 0.024059479 | Acquired spondylolisthesis                                                                 | 15 |  |  |
| 78060 | 0.139079929 | Fever, unspecified                                                                         | 15 |  |  |
| 78064 | 0.024061245 | Chills (without fever)                                                                     | 15 |  |  |
| 78079 | 0.290358344 | Other malaise and fatigue                                                                  | 15 |  |  |
| 7823  | 0.023826119 | Edema                                                                                      | 15 |  |  |
| 7837  | 0.057378459 | Adult failure to thrive                                                                    | 15 |  |  |
| 7905  | 0.064503428 | Other nonspecific abnormal serum enzyme levels                                             | 15 |  |  |
| 8438  | 0.03340716  | Sprains and strains of other specified sites of hip and thigh                              | 15 |  |  |
| 8488  | 0.022867323 | Other specified sites of sprains and strains                                               | 15 |  |  |
| 9352  | 0.017633684 | Foreign body in stomach                                                                    | 15 |  |  |
| 99641 | 0.029141278 | Mechanical loosening of prosthetic joint                                                   | 15 |  |  |
| 99642 | 0.058865503 | Dislocation of prosthetic joint                                                            | 15 |  |  |
| 99647 | 0.022391323 | Other mechanical complication of prosthetic joint implant                                  | 15 |  |  |
| 99649 | 0.027809986 | Other mechanical complication of other internal orthopedic device, implant, and graft      | 15 |  |  |
| 99659 | 0.037156204 | Mechanical complication due to other implant and internal device, not elsewhere classified | 15 |  |  |
| 99677 | 0.03360116  | Other complications due to internal joint prosthesis                                       | 15 |  |  |
| 99799 | 0.056109557 | Complications affecting other specified body systems, not elsewhere classified             | 15 |  |  |
| 99809 | 0.018214029 | Postoperative shock, other                                                                 | 15 |  |  |
| 99813 | 0.025463709 | Seroma complicating a procedure                                                            | 15 |  |  |
| 9982  | 0.058028426 | Accidental puncture or laceration during a procedure, not elsewhere classified             | 15 |  |  |

|       |             |                                                                                 |    |  |  |
|-------|-------------|---------------------------------------------------------------------------------|----|--|--|
| 99851 | 0.143465291 | Infected postoperative seroma                                                   | 15 |  |  |
| 9986  | 0.130625253 | Persistent postoperative fistula                                                | 15 |  |  |
| 99883 | 0.023316668 | Non-healing surgical wound                                                      | 15 |  |  |
| 99889 | 0.137017228 | Other specified complications of procedures not elsewhere classified            | 15 |  |  |
| V0382 | 0.026549563 | Other specified vaccinations against streptococcus pneumoniae<br>[pneumococcus] | 15 |  |  |
| V553  | 0.023483821 | Attention to colostomy                                                          | 15 |  |  |
| V5789 | 0.121395949 | Care involving other specified rehabilitation procedure                         | 15 |  |  |
| V5811 | 0.039591643 | Encounter for antineoplastic chemotherapy                                       | 15 |  |  |
| V5812 | 0.039591643 | Encounter for antineoplastic immunotherapy                                      | 15 |  |  |

**Description of ICD codes for etiology of 30 days readmission.**

| Dx1   | ablation    | Description of ICD codes                                                                                                                                | Level 1 | Level 2 | Level 3 |
|-------|-------------|---------------------------------------------------------------------------------------------------------------------------------------------------------|---------|---------|---------|
| 39891 | 0.055700183 | Rheumatic heart failure (congestive)                                                                                                                    | 1       | A       |         |
| 40291 | 0.361454887 | Unspecified hypertensive heart disease with heart failure                                                                                               | 1       | A       |         |
| 40491 | 0.288356194 | Hypertensive heart and chronic kidney disease, unspecified, with heart failure and with chronic kidney disease stage I through stage IV, or unspecified | 1       | A       |         |
| 40493 | 0.044764055 | Hypertensive heart and chronic kidney disease, unspecified, with heart failure and chronic kidney disease stage V or end stage renal disease            | 1       | A       |         |
| 4280  | 2.794355543 | Congestive heart failure, unspecified                                                                                                                   | 1       | A       |         |
| 42821 | 0.196693549 | Acute systolic heart failure                                                                                                                            | 1       | A       |         |
| 42822 | 0.471497014 | Chronic systolic heart failure                                                                                                                          | 1       | A       |         |
| 42823 | 4.544556808 | Acute on chronic systolic heart failure                                                                                                                 | 1       | A       |         |
| 42830 | 0.331354467 | Diastolic heart failure, unspecified                                                                                                                    | 1       | A       |         |
| 42831 | 1.154282048 | Acute diastolic heart failure                                                                                                                           | 1       | A       |         |
| 42832 | 0.090060658 | Chronic diastolic heart failure                                                                                                                         | 1       | A       |         |
| 42833 | 2.709324398 | Acute on chronic diastolic heart failure                                                                                                                | 1       | A       |         |
| 42841 | 0.113485779 | Acute combined systolic and diastolic heart failure                                                                                                     | 1       | A       |         |
| 42842 | 0.027778809 | Chronic combined systolic and diastolic heart failure                                                                                                   | 1       | A       |         |
| 42843 | 0.580130515 | Acute on chronic combined systolic and diastolic heart failure                                                                                          | 1       | A       |         |
| 42731 | 22.64960738 | Atrial fibrillation                                                                                                                                     | 1       | B       | I       |
| 4260  | 0.100178058 | Atrioventricular block, complete                                                                                                                        | 1       | B       | II      |
| 42613 | 0.034999404 | Other second degree atrioventricular block                                                                                                              | 1       | B       | II      |
| 4266  | 0.059874333 | Other heart block                                                                                                                                       | 1       | B       | II      |
| 42732 | 4.778286857 | Atrial flutter                                                                                                                                          | 1       | B       | III     |
| 4270  | 0.465142096 | Paroxysmal supraventricular tachycardia                                                                                                                 | 1       | B       | VI      |
| 4271  | 0.665015517 | Paroxysmal ventricular tachycardia                                                                                                                      | 1       | B       | VII     |
| 42741 | 0.036599415 | Ventricular fibrillation                                                                                                                                | 1       | B       | IV      |
| 4275  | 0.08318301  | Cardiac arrest                                                                                                                                          | 1       | B       | IV      |

|       |             |                                                                             |   |   |    |
|-------|-------------|-----------------------------------------------------------------------------|---|---|----|
| 42761 | 0.037615193 | Supraventricular premature beats                                            | 1 | B | IV |
| 42781 | 1.507446876 | Sinoatrial node dysfunction                                                 | 1 | B | V  |
| 42789 | 2.212772927 | Other specified cardiac dysrhythmias                                        | 1 | B | IV |
| 41041 | 0.06333183  | Acute myocardial infarction of other inferior wall, initial episode of care | 1 | C |    |
| 41071 | 0.514646269 | Subendocardial infarction, initial episode of care                          | 1 | C |    |
| 41091 | 0.049760758 | Acute myocardial infarction of unspecified site, initial episode of care    | 1 | C |    |
| 4111  | 0.089608235 | Intermediate coronary syndrome                                              | 1 | C |    |
| 41189 | 0.034279553 | Other acute and subacute forms of ischemic heart disease, other             | 1 | C |    |
| 41400 | 0.158649864 | Coronary atherosclerosis of unspecified type of vessel, native or graft     | 1 | C |    |
| 41401 | 0.866444001 | Coronary atherosclerosis of native coronary artery                          | 1 | C |    |
| 41402 | 0.031998    | Coronary atherosclerosis of autologous vein bypass graft                    | 1 | C |    |
| 4148  | 0.060182828 | Other specified forms of chronic ischemic heart disease                     | 1 | C |    |
| 4240  | 0.233018756 | Mitral valve disorders                                                      | 1 | D |    |
| 4241  | 0.113572896 | Aortic valve disorders                                                      | 1 | D |    |
| 4010  | 0.053033355 | Malignant essential hypertension                                            | 1 | E |    |
| 4019  | 0.233698648 | Unspecified essential hypertension                                          | 1 | E |    |
| 4580  | 0.328142795 | Orthostatic hypotension                                                     | 1 | F |    |
| 45821 | 0.037266576 | Hypotension of hemodialysis                                                 | 1 | F |    |
| 45829 | 0.273307835 | Other iatrogenic hypotension                                                | 1 | F |    |
| 4589  | 0.17817814  | Hypotension, unspecified                                                    | 1 | F |    |
| 7802  | 0.598893681 | Syncope and collapse                                                        | 1 | F |    |
| 7804  | 0.236883041 | Dizziness and giddiness                                                     | 1 | F |    |
| 42090 | 0.455966177 | Acute pericarditis, unspecified                                             | 1 | G |    |
| 42099 | 0.216080242 | Other acute pericarditis                                                    | 1 | G |    |
| 4230  | 0.116265157 | Hemopericardium                                                             | 1 | G |    |
| 4232  | 0.029322026 | Constrictive pericarditis                                                   | 1 | G |    |
| 4238  | 0.037181787 | Other specified diseases of pericardium                                     | 1 | G |    |
| 4239  | 1.744647457 | Unspecified disease of pericardium                                          | 1 | G |    |
| 4168  | 0.141103516 | Other chronic pulmonary heart diseases                                      | 1 | H |    |
| 4254  | 0.054855804 | Other primary cardiomyopathies                                              | 1 | H |    |
| 4290  | 0.026992469 | Myocarditis, unspecified                                                    | 1 | H |    |
| 4294  | 0.157125375 | Functional disturbances following cardiac surgery                           | 1 | H |    |

|       |             |                                                                               |   |   |  |
|-------|-------------|-------------------------------------------------------------------------------|---|---|--|
| 42983 | 0.035400427 | Takotsubo syndrome                                                            | 1 | H |  |
| 7455  | 0.031282521 | Ostium secundum type atrial septal defect                                     | 1 | H |  |
| 7851  | 0.242200095 | Palpitations                                                                  | 1 | H |  |
| 78650 | 0.967898327 | Chest pain, unspecified                                                       | 1 | H |  |
| 78651 | 0.073361491 | Precordial pain                                                               | 1 | H |  |
| 78659 | 1.59797417  | Other chest pain                                                              | 1 | H |  |
| 99600 | 0.066213302 | Mechanical complication of unspecified cardiac device, implant, and graft     | 1 | H |  |
| 99601 | 0.545730688 | Mechanical complication due to cardiac pacemaker (electrode)                  | 1 | H |  |
| 99604 | 0.156045269 | Mechanical complication of automatic implantable cardiac defibrillator        | 1 | H |  |
| 99661 | 0.180874581 | Infection and inflammatory reaction due to cardiac device, implant, and graft | 1 | H |  |
| 99672 | 0.124851169 | Other complications due to other cardiac device, implant, and graft           | 1 | H |  |
| 9971  | 0.808873857 | Cardiac complications, not elsewhere classified                               | 1 | H |  |
| 44020 | 0.02057995  | Atherosclerosis of native arteries of the extremities, unspecified            | 2 |   |  |
| 44024 | 0.033675355 | Atherosclerosis of native arteries of the extremities with gangrene           | 2 |   |  |
| 4412  | 0.031223058 | Thoracic aneurysm without mention of rupture                                  | 2 |   |  |
| 4413  | 0.037603377 | Abdominal aneurysm, ruptured                                                  | 2 |   |  |
| 4414  | 0.070495736 | Abdominal aneurysm without mention of rupture                                 | 2 |   |  |
| 4420  | 0.027489595 | Aneurysm of artery of upper extremity                                         | 2 |   |  |
| 4423  | 0.39921174  | Aneurysm of artery of lower extremity                                         | 2 |   |  |
| 44289 | 0.036838614 | Aneurysm of other specified artery                                            | 2 |   |  |
| 44422 | 0.110842444 | Arterial embolism and thrombosis of lower extremity                           | 2 |   |  |
| 44489 | 0.053821626 | Embolism and thrombosis of other specified artery                             | 2 |   |  |
| 4470  | 0.250482045 | Arteriovenous fistula, acquired                                               | 2 |   |  |
| 4510  | 0.033675355 | Phlebitis and thrombophlebitis of superficial vessels of lower extremities    | 2 |   |  |
| 45184 | 0.027404814 | Phlebitis and thrombophlebitis of upper extremities, unspecified              | 2 |   |  |
| 99674 | 0.044290526 | Other complications due to other vascular device, implant, and graft          | 2 |   |  |
| 9972  | 1.849520439 | Peripheral vascular complications, not elsewhere classified                   | 2 |   |  |
| 0380  | 0.129111947 | Streptococcal septicemia                                                      | 3 | A |  |
| 03811 | 0.044495955 | Methicillin susceptible Staphylococcus aureus septicemia                      | 3 | A |  |
| 03812 | 0.205759271 | Methicillin resistant Staphylococcus aureus septicemia                        | 3 | A |  |
| 0383  | 0.027277207 | Septicemia due to anaerobes                                                   | 3 | A |  |
| 03842 | 0.354015706 | Septicemia due to escherichia coli [E. coli]                                  | 3 | A |  |

|       |             |                                                                                                                           |   |   |  |
|-------|-------------|---------------------------------------------------------------------------------------------------------------------------|---|---|--|
| 03843 | 0.034279553 | Septicemia due to pseudomonas                                                                                             | 3 | A |  |
| 0388  | 0.110094043 | Other specified septicemias                                                                                               | 3 | A |  |
| 0389  | 1.701567667 | Unspecified septicemia                                                                                                    | 3 | A |  |
| 00845 | 0.36677978  | Intestinal infection due to Clostridium difficile                                                                         | 3 |   |  |
| 0088  | 0.146806013 | Intestinal infection due to other organism, not elsewhere classified                                                      | 3 |   |  |
| 01194 | 0.040126469 | Pulmonary tuberculosis, unspecified, tubercle bacilli not found (in sputum) by microscopy, but found by bacterial culture | 3 |   |  |
| 01334 | 0.040981343 | Tuberculous abscess of brain, tubercle bacilli not found (in sputum) by microscopy, but found by bacterial culture        | 3 |   |  |
| 042   | 0.043683596 | Human immunodeficiency virus [HIV] disease                                                                                | 3 |   |  |
| 0521  | 0.034877233 | Varicella (hemorrhagic) pneumonitis                                                                                       | 3 |   |  |
| 0539  | 0.050167654 | Herpes zoster without mention of complication                                                                             | 3 |   |  |
| 0543  | 0.044095253 | Herpetic meningoencephalitis                                                                                              | 3 |   |  |
| 0661  | 0.044863253 | Tick-borne fever                                                                                                          | 3 |   |  |
| 0793  | 0.0516149   | Rhinovirus infection in conditions classified elsewhere and of unspecified site                                           | 3 |   |  |
| 07999 | 0.067862371 | Unspecified viral infection                                                                                               | 3 |   |  |
| 6822  | 0.033547018 | Cellulitis and abscess of trunk                                                                                           | 3 |   |  |
| 6823  | 0.047701025 | Cellulitis and abscess of upper arm and forearm                                                                           | 3 |   |  |
| 6824  | 0.071059465 | Cellulitis and abscess of hand, except fingers and thumb                                                                  | 3 |   |  |
| 6826  | 0.414483075 | Cellulitis and abscess of leg, except foot                                                                                | 3 |   |  |
| 6827  | 0.197071625 | Cellulitis and abscess of foot, except toes                                                                               | 3 |   |  |
| 73028 | 0.032192514 | Unspecified osteomyelitis, other specified sites                                                                          | 3 |   |  |
| 7907  | 0.1004461   | Bacteremia                                                                                                                | 3 |   |  |
| 99590 | 0.064159295 | Systemic inflammatory response syndrome, unspecified                                                                      | 3 |   |  |
| 99859 | 0.398145309 | Other postoperative infection                                                                                             | 3 |   |  |
| 99932 | 0.027880896 | Bloodstream infection due to central venous catheter                                                                      | 3 |   |  |
| 99939 | 0.027880896 | Infection following other infusion, injection, transfusion, or vaccination                                                | 3 |   |  |
| 51881 | 0.904220487 | Acute respiratory failure                                                                                                 | 4 | A |  |
| 51884 | 0.30206047  | Acute and chronic respiratory failure                                                                                     | 4 | A |  |
| 4660  | 0.119489831 | Acute bronchitis                                                                                                          | 4 | B |  |
| 490   | 0.031133585 | Bronchitis, not specified as acute or chronic                                                                             | 4 | B |  |

|       |             |                                                                                       |   |   |  |
|-------|-------------|---------------------------------------------------------------------------------------|---|---|--|
| 4911  | 0.037918132 | Mucopurulent chronic bronchitis                                                       | 4 | B |  |
| 49121 | 1.007818794 | Obstructive chronic bronchitis with (acute) exacerbation                              | 4 | B |  |
| 49122 | 0.200429898 | Obstructive chronic bronchitis with acute bronchitis                                  | 4 | B |  |
| 49322 | 0.432527281 | Chronic obstructive asthma with (acute) exacerbation                                  | 4 | B |  |
| 49390 | 0.03382659  | Asthma, unspecified type, unspecified                                                 | 4 | B |  |
| 49392 | 0.156725202 | Asthma, unspecified type, with (acute) exacerbation                                   | 4 | B |  |
| 4809  | 0.033810897 | Viral pneumonia, unspecified                                                          | 4 | C |  |
| 4820  | 0.042466195 | Pneumonia due to Klebsiella pneumoniae                                                | 4 | C |  |
| 48230 | 0.031710177 | Pneumonia due to Streptococcus, unspecified                                           | 4 | C |  |
| 48242 | 0.186079378 | Methicillin resistant pneumonia due to Staphylococcus aureus                          | 4 | C |  |
| 48283 | 0.102271255 | Pneumonia due to other gram-negative bacteria                                         | 4 | C |  |
| 4829  | 0.047701025 | Bacterial pneumonia, unspecified                                                      | 4 | C |  |
| 486   | 2.333631459 | Pneumonia, organism unspecified                                                       | 4 | C |  |
| 5070  | 0.559543833 | Pneumonitis due to inhalation of food or vomitus                                      | 4 | C |  |
| 51633 | 0.031296026 | Acute interstitial pneumonitis                                                        | 4 | C |  |
| 32723 | 0.040981343 | Obstructive sleep apnea (adult)(pediatric)                                            | 4 | D |  |
| 4150  | 0.035591102 | Acute cor pulmonale                                                                   | 4 | D |  |
| 4659  | 0.081715137 | Acute upper respiratory infections of unspecified site                                | 4 | D |  |
| 5109  | 0.065545324 | Empyema without mention of fistula                                                    | 4 | D |  |
| 5110  | 0.041485512 | Pleurisy without mention of effusion or current tuberculosis                          | 4 | D |  |
| 51189 | 0.095655552 | Other specified forms of effusion, except tuberculous                                 | 4 | D |  |
| 5119  | 0.537196926 | Unspecified pleural effusion                                                          | 4 | D |  |
| 514   | 0.057237841 | Pulmonary congestion and hypostasis                                                   | 4 | D |  |
| 515   | 0.028361163 | Postinflammatory pulmonary fibrosis                                                   | 4 | D |  |
| 5183  | 0.030836915 | Pulmonary eosinophilia                                                                | 4 | D |  |
| 5184  | 0.217591729 | Acute edema of lung, unspecified                                                      | 4 | D |  |
| 51852 | 0.036543736 | Other pulmonary insufficiency, not elsewhere classified, following trauma and surgery | 4 | D |  |
| 5194  | 0.045103098 | Disorders of diaphragm                                                                | 4 | D |  |
| 78605 | 0.093646015 | Shortness of breath                                                                   | 4 | D |  |
| 78609 | 0.179128612 | Other respiratory abnormalities                                                       | 4 | D |  |
| 78652 | 0.13635189  | Painful respiration                                                                   | 4 | D |  |

|       |             |                                                                                     |   |  |  |
|-------|-------------|-------------------------------------------------------------------------------------|---|--|--|
| 4552  | 0.079089259 | Internal hemorrhoids with other complication                                        | 5 |  |  |
| 4555  | 0.034927084 | External hemorrhoids with other complication                                        | 5 |  |  |
| 4558  | 0.035400427 | Unspecified hemorrhoids with other complication                                     | 5 |  |  |
| 5300  | 0.03429958  | Achalasia and cardiospasm                                                           | 5 |  |  |
| 53010 | 0.037688781 | Esophagitis, unspecified                                                            | 5 |  |  |
| 53020 | 0.037726816 | Ulcer of esophagus without bleeding                                                 | 5 |  |  |
| 5305  | 0.033961848 | Dyskinesia of esophagus                                                             | 5 |  |  |
| 53081 | 0.120317353 | Esophageal reflux                                                                   | 5 |  |  |
| 53500 | 0.021697154 | Acute gastritis, without mention of hemorrhage                                      | 5 |  |  |
| 53540 | 0.04773753  | Other specified gastritis, without mention of hemorrhage                            | 5 |  |  |
| 53550 | 0.085236534 | Unspecified gastritis and gastroduodenitis, without mention of hemorrhage           | 5 |  |  |
| 5362  | 0.040605186 | Persistent vomiting                                                                 | 5 |  |  |
| 5363  | 0.077237622 | Gastroparesis                                                                       | 5 |  |  |
| 53649 | 0.110842444 | Other gastrostomy complications                                                     | 5 |  |  |
| 5370  | 0.033891362 | Acquired hypertrophic pyloric stenosis                                              | 5 |  |  |
| 5401  | 0.027555853 | Acute appendicitis with peritoneal abscess                                          | 5 |  |  |
| 5409  | 0.069454787 | Acute appendicitis without mention of peritonitis                                   | 5 |  |  |
| 5570  | 0.035187293 | Acute vascular insufficiency of intestine                                           | 5 |  |  |
| 5571  | 0.043037227 | Chronic vascular insufficiency of intestine                                         | 5 |  |  |
| 5579  | 0.062463597 | Unspecified vascular insufficiency of intestine                                     | 5 |  |  |
| 5589  | 0.309256991 | Other and unspecified noninfectious gastroenteritis and colitis                     | 5 |  |  |
| 5601  | 0.147820637 | Paralytic ileus                                                                     | 5 |  |  |
| 56031 | 0.036743359 | Gallstone ileus                                                                     | 5 |  |  |
| 56081 | 0.083051367 | Intestinal or peritoneal adhesions with obstruction (postoperative) (postinfection) | 5 |  |  |
| 56089 | 0.030973468 | Other specified intestinal obstruction                                              | 5 |  |  |
| 5609  | 0.265916124 | Unspecified intestinal obstruction                                                  | 5 |  |  |
| 56211 | 0.139142022 | Diverticulitis of colon (without mention of hemorrhage)                             | 5 |  |  |
| 56400 | 0.029321478 | Constipation, unspecified                                                           | 5 |  |  |
| 5641  | 0.079811627 | Irritable bowel syndrome                                                            | 5 |  |  |
| 5680  | 0.037603377 | Peritoneal adhesions (postoperative) (postinfection)                                | 5 |  |  |
| 56949 | 0.05389285  | Other specified disorders of rectum and anus                                        | 5 |  |  |



|       |             |                                                                                                |   |   |  |
|-------|-------------|------------------------------------------------------------------------------------------------|---|---|--|
| 5715  | 0.043118798 | Cirrhosis of liver without mention of alcohol                                                  | 5 |   |  |
| 5722  | 0.034414162 | Hepatic encephalopathy                                                                         | 5 |   |  |
| 5724  | 0.068828325 | Hepatorenal syndrome                                                                           | 5 |   |  |
| 5728  | 0.054172783 | Other sequelae of chronic liver disease                                                        | 5 |   |  |
| 57400 | 0.2155727   | Calculus of gallbladder with acute cholecystitis, without mention of obstruction               | 5 |   |  |
| 57410 | 0.064583009 | Calculus of gallbladder with other cholecystitis, without mention of obstruction               | 5 |   |  |
| 57420 | 0.179200229 | Calculus of gallbladder without mention of cholecystitis, without mention of obstruction       | 5 |   |  |
| 57470 | 0.03382659  | Calculus of gallbladder and bile duct with other cholecystitis, without mention of obstruction | 5 |   |  |
| 57471 | 0.059519738 | Calculus of gallbladder and bile duct with other cholecystitis, with obstruction               | 5 |   |  |
| 5750  | 0.029322026 | Acute cholecystitis                                                                            | 5 |   |  |
| 57511 | 0.03602405  | Chronic cholecystitis                                                                          | 5 |   |  |
| 5761  | 0.08881793  | Cholangitis                                                                                    | 5 |   |  |
| 5770  | 0.097442803 | Acute pancreatitis                                                                             | 5 |   |  |
| 5772  | 0.037170094 | Cyst and pseudocyst of pancreas                                                                | 5 |   |  |
| 78701 | 0.138658277 | Nausea with vomiting                                                                           | 5 |   |  |
| 78720 | 0.034534223 | Dysphagia, unspecified                                                                         | 5 |   |  |
| 78901 | 0.047472853 | Abdominal pain, right upper quadrant                                                           | 5 |   |  |
| 78902 | 0.03156901  | Abdominal pain, left upper quadrant                                                            | 5 |   |  |
| 78903 | 0.041525683 | Abdominal pain, right lower quadrant                                                           | 5 |   |  |
| 78906 | 0.076071189 | Abdominal pain, epigastric                                                                     | 5 |   |  |
| 78907 | 0.032770678 | Abdominal pain, generalized                                                                    | 5 |   |  |
| 9974  | 0.101136723 | Digestive system complications not elsewhere classified                                        | 5 |   |  |
| 43310 | 0.105392098 | Occlusion and stenosis of carotid artery without mention of cerebral infarction                | 6 | A |  |
| 43311 | 0.030918355 | Occlusion and stenosis of carotid artery with cerebral infarction                              | 6 | A |  |
| 43400 | 0.030707648 | Cerebral thrombosis without mention of cerebral infarction                                     | 6 | A |  |
| 43411 | 0.335369469 | Cerebral embolism with cerebral infarction                                                     | 6 | A |  |

|       |             |                                                                                                              |   |   |  |
|-------|-------------|--------------------------------------------------------------------------------------------------------------|---|---|--|
| 43491 | 0.746265614 | Cerebral artery occlusion, unspecified with cerebral infarction                                              | 6 | A |  |
| 4358  | 0.036957879 | Other specified transient cerebral ischemias                                                                 | 6 | A |  |
| 4359  | 0.393311458 | Unspecified transient cerebral ischemia                                                                      | 6 | A |  |
| 4370  | 0.036319939 | Cerebral atherosclerosis                                                                                     | 6 | A |  |
| 4371  | 0.026746486 | Other generalized ischemic cerebrovascular disease                                                           | 6 | A |  |
| 3310  | 0.044514645 | Alzheimer's disease                                                                                          | 6 | B |  |
| 33182 | 0.028690747 | Dementia with lewy bodies                                                                                    | 6 | B |  |
| 33812 | 0.043683596 | Acute post-thoracotomy pain                                                                                  | 6 | B |  |
| 33818 | 0.064616751 | Other acute postoperative pain                                                                               | 6 | B |  |
| 3383  | 0.090928611 | Neoplasm related pain (acute) (chronic)                                                                      | 6 | B |  |
| 34580 | 0.043683596 | Other forms of epilepsy and recurrent seizures, without mention of intractable epilepsy                      | 6 | B |  |
| 34670 | 0.059536091 | Chronic migraine without aura, without mention of intractable migraine without mention of status migrainosus | 6 | B |  |
| 34680 | 0.074781498 | Other forms of migraine, without mention of intractable migraine without mention of status migrainosus       | 6 | B |  |
| 34690 | 0.032876335 | Migraine, unspecified, without mention of intractable migraine without mention of status migrainosus         | 6 | B |  |
| 34691 | 0.096204821 | Migraine, unspecified, with intractable migraine, so stated, without mention of status migrainosus           | 6 | B |  |
| 3481  | 0.035219496 | Anoxic brain damage                                                                                          | 6 | B |  |
| 34839 | 0.041129069 | Other encephalopathy                                                                                         | 6 | B |  |
| 34982 | 0.034637112 | Toxic encephalopathy                                                                                         | 6 | B |  |
| 3558  | 0.050478338 | Mononeuritis of lower limb, unspecified                                                                      | 6 | B |  |
| 3576  | 0.044290526 | Polyneuropathy due to drugs                                                                                  | 6 | B |  |
| 35801 | 0.033329086 | Myasthenia gravis with (acute) exacerbation                                                                  | 6 | B |  |
| 4377  | 0.033675355 | Transient global amnesia                                                                                     | 6 | B |  |
| 4378  | 0.039508945 | Other ill-defined cerebrovascular disease                                                                    | 6 | B |  |
| 7840  | 0.041525683 | Headache                                                                                                     | 6 | B |  |
| 2760  | 0.026992469 | Hyperosmolality and/or hypernatremia                                                                         | 7 | A |  |
| 2761  | 0.461781548 | Hyposmolality and/or hyponatremia                                                                            | 7 | A |  |
| 2768  | 0.080620155 | Hypopotassemia                                                                                               | 7 | A |  |

|       |             |                                                                                                                        |   |   |  |
|-------|-------------|------------------------------------------------------------------------------------------------------------------------|---|---|--|
| 40390 | 0.041734355 | Hypertensive chronic kidney disease, unspecified, with chronic kidney disease stage I through stage IV, or unspecified | 7 | B |  |
| 40391 | 0.062582136 | Hypertensive chronic kidney disease, unspecified, with chronic kidney disease stage V or end stage renal disease       | 7 | B |  |
| 5845  | 0.032095094 | Acute kidney failure with lesion of tubular necrosis                                                                   | 7 | B |  |
| 5849  | 1.376463572 | Acute kidney failure, unspecified                                                                                      | 7 | B |  |
| 5856  | 0.045761995 | End stage renal disease                                                                                                | 7 | B |  |
| 59080 | 0.034633306 | Pyelonephritis, unspecified                                                                                            | 7 | C |  |
| 5921  | 0.190413053 | Calculus of ureter                                                                                                     | 7 | C |  |
| 59582 | 0.03429958  | Irradiation cystitis                                                                                                   | 7 | C |  |
| 5960  | 0.038429877 | Bladder neck obstruction                                                                                               | 7 | C |  |
| 5990  | 0.780458415 | Urinary tract infection, site not specified                                                                            | 7 | C |  |
| 60000 | 0.093730942 | Hypertrophy (benign) of prostate without urinary obstruction and other lower urinary tract symptom (LUTS)              | 7 | C |  |
| 60001 | 0.056698669 | Hypertrophy (benign) of prostate with urinary obstruction and other lower urinary tract symptoms (LUTS)                | 7 | C |  |
| 6010  | 0.063711906 | Acute prostatitis                                                                                                      | 7 | C |  |
| 99631 | 0.149341225 | Mechanical complication due to urethral (indwelling) catheter                                                          | 7 | C |  |
| 99664 | 0.360724716 | Infection and inflammatory reaction due to indwelling urinary catheter                                                 | 7 | C |  |
| 99673 | 0.048760876 | Other complications due to renal dialysis device, implant, and graft                                                   | 7 | C |  |
| 99676 | 0.09711838  | Other complications due to genitourinary device, implant, and graft                                                    | 7 | C |  |
| 99732 | 0.043192692 | Postprocedural aspiration pneumonia                                                                                    | 7 | C |  |
| 99739 | 0.305984797 | Other respiratory complications                                                                                        | 7 | C |  |
| 9975  | 0.064080037 | Urinary complications, not elsewhere classified                                                                        | 7 | C |  |
| 2800  | 0.066072314 | Iron deficiency anemia secondary to blood loss (chronic)                                                               | 8 | A |  |
| 28319 | 0.040126469 | Other non-autoimmune hemolytic anemias                                                                                 | 8 | A |  |
| 2851  | 0.295336865 | Acute posthemorrhagic anemia                                                                                           | 8 | A |  |
| 28521 | 0.067899314 | Anemia in chronic kidney disease                                                                                       | 8 | A |  |
| 28522 | 0.035187529 | Anemia in neoplastic disease                                                                                           | 8 | A |  |
| 28529 | 0.050053851 | Anemia of other chronic disease                                                                                        | 8 | A |  |
| 2859  | 0.111928606 | Anemia, unspecified                                                                                                    | 8 | A |  |

|       |             |                                                                                                       |    |   |  |
|-------|-------------|-------------------------------------------------------------------------------------------------------|----|---|--|
| 28659 | 0.038349867 | Other hemorrhagic disorder due to intrinsic circulating anticoagulants, antibodies, or inhibitors     | 8  | B |  |
| 28981 | 0.031649436 | Primary hypercoagulable state                                                                         | 8  | B |  |
| 79092 | 0.23173945  | Abnormal coagulation profile                                                                          | 8  | B |  |
| 73382 | 0.026767595 | Nonunion of fracture                                                                                  | 9  |   |  |
| 8052  | 0.062096879 | Closed fracture of dorsal [thoracic] vertebra without mention of spinal cord injury                   | 9  |   |  |
| 8056  | 0.070085066 | Closed fracture of sacrum and coccyx without mention of spinal cord injury                            | 9  |   |  |
| 80703 | 0.03285072  | Closed fracture of three ribs                                                                         | 9  |   |  |
| 80705 | 0.043421188 | Closed fracture of five ribs                                                                          | 9  |   |  |
| 82009 | 0.09346889  | Other closed transcervical fracture of neck of femur                                                  | 9  |   |  |
| 8208  | 0.066267912 | Closed fracture of unspecified part of neck of femur                                                  | 9  |   |  |
| 82535 | 0.032858098 | Open fracture of metatarsal bone(s)                                                                   | 9  |   |  |
| 8488  | 0.035126602 | Other specified sites of sprains and strains                                                          | 9  |   |  |
| 85011 | 0.039508945 | Concussion, with loss of consciousness of 30 minutes or less                                          | 9  |   |  |
| 8604  | 0.033329086 | Traumatic pneumothorax without mention of open wound into thorax                                      | 9  |   |  |
| 8670  | 0.157967689 | Injury to bladder and urethra, without mention of open wound into cavity                              | 9  |   |  |
| 87211 | 0.034152958 | Open wound of auricle, ear, complicated                                                               | 9  |   |  |
| 8911  | 0.046990975 | Open wound of knee, leg [except thigh], and ankle, complicated                                        | 9  |   |  |
| 9222  | 0.034534223 | Contusion of abdominal wall                                                                           | 9  |   |  |
| 9551  | 0.041597922 | Injury to median nerve                                                                                | 9  |   |  |
| 9623  | 0.121369637 | Poisoning by insulins and antidiabetic agents                                                         | 9  |   |  |
| 9642  | 0.041437884 | Poisoning by anticoagulants                                                                           | 9  |   |  |
| 96509 | 0.032770678 | Poisoning by other opiates and related narcotics                                                      | 9  |   |  |
| 25012 | 0.034981461 | Diabetes with ketoacidosis, type II or unspecified type, uncontrolled                                 | 10 | A |  |
| 25060 | 0.091439456 | Diabetes with neurological manifestations, type II or unspecified type, not stated as uncontrolled    | 10 | A |  |
| 25062 | 0.043161113 | Diabetes with neurological manifestations, type II or unspecified type, uncontrolled                  | 10 | A |  |
| 25080 | 0.136130499 | Diabetes with other specified manifestations, type II or unspecified type, not stated as uncontrolled | 10 | A |  |
| 2449  | 0.079142849 | Unspecified acquired hypothyroidism                                                                   | 10 | B |  |

|       |             |                                                                                       |    |   |   |
|-------|-------------|---------------------------------------------------------------------------------------|----|---|---|
| 2536  | 0.125701116 | Other disorders of neurohypophysis                                                    | 10 | B |   |
| 1532  | 0.039648458 | Malignant neoplasm of descending colon                                                | 11 |   |   |
| 1533  | 0.034395416 | Malignant neoplasm of sigmoid colon                                                   | 11 |   |   |
| 1539  | 0.038252283 | Malignant neoplasm of colon, unspecified site                                         | 11 |   |   |
| 1622  | 0.075252606 | Malignant neoplasm of main bronchus                                                   | 11 |   |   |
| 1623  | 0.108874178 | Malignant neoplasm of upper lobe, bronchus or lung                                    | 11 |   |   |
| 1625  | 0.037170094 | Malignant neoplasm of lower lobe, bronchus or lung                                    | 11 |   |   |
| 1629  | 0.143461262 | Malignant neoplasm of bronchus and lung, unspecified                                  | 11 |   |   |
| 1890  | 0.102601811 | Malignant neoplasm of kidney, except pelvis                                           | 11 |   |   |
| 1970  | 0.043084307 | Secondary malignant neoplasm of lung                                                  | 11 |   |   |
| 1972  | 0.04671944  | Secondary malignant neoplasm of pleura                                                | 11 |   |   |
| 1983  | 0.033569521 | Secondary malignant neoplasm of brain and spinal cord                                 | 11 |   |   |
| 1985  | 0.034395416 | Secondary malignant neoplasm of bone and bone marrow                                  | 11 |   |   |
| 20288 | 0.06081691  | Other malignant lymphomas, lymph nodes of multiple sites                              | 11 |   |   |
| 20300 | 0.062961862 | Multiple myeloma, without mention of having achieved remission                        | 11 |   |   |
| 2111  | 0.040782909 | Benign neoplasm of stomach                                                            | 11 |   |   |
| 5307  | 0.043808758 | Gastroesophageal laceration-hemorrhage syndrome                                       | 12 | A |   |
| 53140 | 0.107888291 | Chronic or unspecified gastric ulcer with hemorrhage, without mention of obstruction  | 12 | A |   |
| 53240 | 0.072551438 | Chronic or unspecified duodenal ulcer with hemorrhage, without mention of obstruction | 12 | A |   |
| 53541 | 0.030628212 | Other specified gastritis, with hemorrhage                                            | 12 | A |   |
| 56212 | 0.069517126 | Diverticulosis of colon with hemorrhage                                               | 12 | A |   |
| 56881 | 0.083642412 | Hemoperitoneum (nontraumatic)                                                         | 12 | A |   |
| 5693  | 0.221288249 | Hemorrhage of rectum and anus                                                         | 12 | A |   |
| 5781  | 0.28634984  | Blood in stool                                                                        | 12 | A |   |
| 5789  | 0.582024443 | Hemorrhage of gastrointestinal tract, unspecified                                     | 12 | A |   |
| 430   | 0.050949514 | Subarachnoid hemorrhage                                                               | 12 | B | I |
| 431   | 0.157566381 | Intracerebral hemorrhage                                                              | 12 | B | I |
| 4321  | 0.198824219 | Subdural hemorrhage                                                                   | 12 | B | I |
| 4329  | 0.027142427 | Unspecified intracranial hemorrhage                                                   | 12 | B | I |

|       |             |                                                                                                                                                                         |    |   |    |
|-------|-------------|-------------------------------------------------------------------------------------------------------------------------------------------------------------------------|----|---|----|
| 80422 | 0.035171089 | Closed fractures involving skull or face with other bones with subarachnoid, subdural, and extradural hemorrhage, with brief [less than one hour] loss of consciousness | 12 | B | II |
| 85300 | 0.067691448 | Other and unspecified intracranial hemorrhage following injury without mention of open intracranial wound, unspecified state of consciousness                           | 12 | B | II |
| 85301 | 0.028349335 | Other and unspecified intracranial hemorrhage following injury without mention of open intracranial wound, with no loss of consciousness                                | 12 | B | II |
| 56985 | 0.082729773 | Angiodysplasia of intestine with hemorrhage                                                                                                                             | 12 | C |    |
| 56986 | 0.034633306 | Dieulafoy lesion (hemorrhagic) of intestine                                                                                                                             | 12 | C |    |
| 59971 | 0.235147052 | Gross hematuria                                                                                                                                                         | 12 | C |    |
| 78630 | 0.032858098 | Hemoptysis, unspecified                                                                                                                                                 | 12 | C |    |
| 99811 | 0.254061285 | Hemorrhage complicating a procedure                                                                                                                                     | 12 | C |    |
| 99812 | 2.737450179 | Hematoma complicating a procedure                                                                                                                                       | 12 | C |    |
| 2910  | 0.038349867 | Alcohol withdrawal delirium                                                                                                                                             | 13 |   |    |
| 29181 | 0.036599415 | Alcohol withdrawal                                                                                                                                                      | 13 |   |    |
| 2920  | 0.034027752 | Drug withdrawal                                                                                                                                                         | 13 |   |    |
| 29572 | 0.02084305  | Schizoaffective disorder, chronic                                                                                                                                       | 13 |   |    |
| 29620 | 0.066476957 | Major depressive affective disorder, single episode, unspecified                                                                                                        | 13 |   |    |
| 29630 | 0.033808789 | Major depressive affective disorder, recurrent episode, unspecified                                                                                                     | 13 |   |    |
| 29632 | 0.033552959 | Major depressive affective disorder, recurrent episode, moderate                                                                                                        | 13 |   |    |
| 29633 | 0.065923574 | Major depressive affective disorder, recurrent episode, severe, without mention of psychotic behavior                                                                   | 13 |   |    |
| 29636 | 0.025254546 | Major depressive affective disorder, recurrent episode, in full remission                                                                                               | 13 |   |    |
| 29650 | 0.059849008 | Bipolar I disorder, most recent episode (or current) depressed, unspecified                                                                                             | 13 |   |    |
| 2989  | 0.03214524  | Unspecified psychosis                                                                                                                                                   | 13 |   |    |
| 30000 | 0.03841689  | Anxiety state, unspecified                                                                                                                                              | 13 |   |    |
| 30300 | 0.052296384 | Acute alcoholic intoxication in alcoholism, unspecified                                                                                                                 | 13 |   |    |
| 30390 | 0.038349867 | Other and unspecified alcohol dependence, unspecified                                                                                                                   | 13 |   |    |
| 41511 | 0.136076819 | Iatrogenic pulmonary embolism and infarction                                                                                                                            | 14 |   |    |
| 41519 | 0.505217556 | Other pulmonary embolism and infarction                                                                                                                                 | 14 |   |    |
| 45340 | 0.187089885 | Acute venous embolism and thrombosis of unspecified deep vessels of lower extremity                                                                                     | 14 |   |    |

|       |             |                                                                                                |    |  |  |
|-------|-------------|------------------------------------------------------------------------------------------------|----|--|--|
| 45341 | 0.430114737 | Acute venous embolism and thrombosis of deep vessels of proximal lower extremity               | 14 |  |  |
| 45381 | 0.03602405  | Acute venous embolism and thrombosis of superficial veins of upper extremity                   | 14 |  |  |
| 135   | 0.038630829 | Sarcoidosis                                                                                    | 15 |  |  |
| 27400 | 0.067220235 | Gouty arthropathy, unspecified                                                                 | 15 |  |  |
| 27651 | 0.150984627 | Dehydration                                                                                    | 15 |  |  |
| 27661 | 0.05092794  | Transfusion associated circulatory overload                                                    | 15 |  |  |
| 27669 | 0.180219455 | Other fluid overload                                                                           | 15 |  |  |
| 35979 | 0.033961848 | Other inflammatory and immune myopathies, NEC                                                  | 15 |  |  |
| 3693  | 0.048822073 | Unqualified visual loss, both eyes                                                             | 15 |  |  |
| 38610 | 0.020536157 | Peripheral vertigo, unspecified                                                                | 15 |  |  |
| 38611 | 0.066706433 | Benign paroxysmal positional vertigo                                                           | 15 |  |  |
| 4568  | 0.02910206  | Varices of other sites                                                                         | 15 |  |  |
| 55221 | 0.036986437 | Incisional ventral hernia with obstruction                                                     | 15 |  |  |
| 6273  | 0.042466195 | Postmenopausal atrophic vaginitis                                                              | 15 |  |  |
| 70714 | 0.038374405 | Ulcer of heel and midfoot                                                                      | 15 |  |  |
| 7092  | 0.037952501 | Scar conditions and fibrosis of skin                                                           | 15 |  |  |
| 7093  | 0.033675355 | Degenerative skin disorders                                                                    | 15 |  |  |
| 7098  | 0.034086681 | Other specified disorders of skin                                                              | 15 |  |  |
| 71535 | 0.031282521 | Osteoarthritis, localized, not specified whether primary or secondary, pelvic region and thigh | 15 |  |  |
| 71538 | 0.039531625 | Osteoarthritis, localized, not specified whether primary or secondary, other specified sites   | 15 |  |  |
| 7210  | 0.059519738 | Cervical spondylosis without myelopathy                                                        | 15 |  |  |
| 7211  | 0.068376688 | Cervical spondylosis with myelopathy                                                           | 15 |  |  |
| 7213  | 0.030242692 | Lumbosacral spondylosis without myelopathy                                                     | 15 |  |  |
| 72252 | 0.04773753  | Degeneration of lumbar or lumbosacral intervertebral disc                                      | 15 |  |  |
| 72400 | 0.037952501 | Spinal stenosis, unspecified region                                                            | 15 |  |  |
| 72402 | 0.034279553 | Spinal stenosis, lumbar region, without neurogenic claudication                                | 15 |  |  |
| 7242  | 0.034954273 | Lumbago                                                                                        | 15 |  |  |
| 7244  | 0.040925615 | Thoracic or lumbosacral neuritis or radiculitis, unspecified                                   | 15 |  |  |

|       |             |                                                                                            |    |  |  |
|-------|-------------|--------------------------------------------------------------------------------------------|----|--|--|
| 72886 | 0.040605186 | Necrotizing fasciitis                                                                      | 15 |  |  |
| 72889 | 0.088572249 | Other disorders of muscle, ligament, and fascia                                            | 15 |  |  |
| 7292  | 0.035613299 | Neuralgia, neuritis, and radiculitis, unspecified                                          | 15 |  |  |
| 72989 | 0.05885991  | Other musculoskeletal symptoms referable to limbs                                          | 15 |  |  |
| 72992 | 0.063562323 | Nontraumatic hematoma of soft tissue                                                       | 15 |  |  |
| 73679 | 0.038265782 | Other acquired deformities of ankle and foot                                               | 15 |  |  |
| 78060 | 0.213641336 | Fever, unspecified                                                                         | 15 |  |  |
| 78064 | 0.036960592 | Chills (without fever)                                                                     | 15 |  |  |
| 78079 | 0.384644277 | Other malaise and fatigue                                                                  | 15 |  |  |
| 7837  | 0.032664138 | Adult failure to thrive                                                                    | 15 |  |  |
| 7905  | 0.099084021 | Other nonspecific abnormal serum enzyme levels                                             | 15 |  |  |
| 9352  | 0.027087186 | Foreign body in stomach                                                                    | 15 |  |  |
| 99641 | 0.044764055 | Mechanical loosening of prosthetic joint                                                   | 15 |  |  |
| 99642 | 0.026767595 | Dislocation of prosthetic joint                                                            | 15 |  |  |
| 99659 | 0.05707582  | Mechanical complication due to other implant and internal device, not elsewhere classified | 15 |  |  |
| 99666 | 0.067364983 | Infection and inflammatory reaction due to internal joint prosthesis                       | 15 |  |  |
| 99799 | 0.053339436 | Complications affecting other specified body systems, not elsewhere classified             | 15 |  |  |
| 99809 | 0.027978656 | Postoperative shock, other                                                                 | 15 |  |  |
| 9982  | 0.047557017 | Accidental puncture or laceration during a procedure, not elsewhere classified             | 15 |  |  |
| 99851 | 0.03429958  | Infected postoperative seroma                                                              | 15 |  |  |
| 9986  | 0.200654069 | Persistent postoperative fistula                                                           | 15 |  |  |
| 99883 | 0.035816844 | Non-healing surgical wound                                                                 | 15 |  |  |
| 99889 | 0.210472812 | Other specified complications of procedures not elsewhere classified                       | 15 |  |  |
| V0382 | 0.040782909 | Other specified vaccinations against streptococcus pneumoniae [pneumococcus]               | 15 |  |  |
| V5331 | 0.03285072  | Fitting and adjustment of cardiac pacemaker                                                | 15 |  |  |
| V5789 | 0.155503424 | Care involving other specified rehabilitation procedure                                    | 15 |  |  |
| V5811 | 0.06081691  | Encounter for antineoplastic chemotherapy                                                  | 15 |  |  |
| V5812 | 0.06081691  | Encounter for antineoplastic immunotherapy                                                 | 15 |  |  |



**Table S3. ICD 9 codes used to identify co morbidities.**

| Co-morbidities                                                                      | ICD 9 CM diagnosis codes                    |
|-------------------------------------------------------------------------------------|---------------------------------------------|
| Obstructive sleep apnea                                                             | 327.23                                      |
| Heart failure                                                                       | 402.01/11/91, 404.01/03/11/91/93, 428       |
| Coronary artery disease                                                             | 410-414, V45.82                             |
| Chronic kidney disease (Stage 3 or more)                                            | 585.3/4/5/6, V45.11, 39.95(procedural code) |
| Prior coronary artery bypass graft                                                  | V45.81                                      |
| Hyperthyroidism                                                                     | 242                                         |
| Mitral valve disease                                                                | 424.0                                       |
| Prior Stroke/TIA                                                                    | 438, V12.54                                 |
| Co morbidities were identified using above ICD 9 codes in secondary diagnosis field |                                             |

**Table S4. Deyo's modification of Charlson's co-morbidity index (CCI).**

| Reported ICD-9 CM Codes                         | Condition                                      | Charlson Score |
|-------------------------------------------------|------------------------------------------------|----------------|
| 410 – 410.9                                     | Myocardial infarction                          | 1              |
| 428 – 428.9                                     | Congestive heart failure                       | 1              |
| 433.9, 441 – 441.9, 785.4, V43.4                | Peripheral vascular disease                    | 1              |
| 430 – 438                                       | Cerebrovascular disease                        | 1              |
| 290 – 290.9                                     | Dementia                                       | 1              |
| 490 – 496, 500 – 505, 506.4                     | Chronic pulmonary disease                      | 1              |
| 710.0, 710.1, 710.4, 714.0 – 714.2, 714.81, 725 | Rheumatologic disease                          | 1              |
| 531 – 534.9                                     | Peptic ulcer disease                           | 1              |
| 571.2, 571.5, 571.6, 571.4 – 571.49             | Mild liver disease                             | 1              |
| 250 – 250.3, 250.7                              | Diabetes                                       | 1              |
| 250.4 – 250.6                                   | Diabetes with chronic complications            | 2              |
| 344.1, 342 – 342.9                              | Hemiplegia or paraplegia                       | 2              |
| 582 – 582.9, 583 – 583.7, 585, 586, 588 – 588.9 | Renal disease                                  | 2              |
| 140-172.9, 174-195.8, 200-208.9                 | Any malignancy including leukemia and lymphoma | 2              |
| 572.2 – 572.8                                   | Moderate or severe liver disease               | 3              |
| 196 -199.1                                      | Metastatic solid tumor                         | 6              |
| 042 – 044.9                                     | AIDS                                           | 6              |

**Table S5. Multivariate analysis of utilization of catheter ablation for atrial fibrillation.**

|                                                         | Multivariate of catheter ablation in atrial fibrillation |          |          |         |
|---------------------------------------------------------|----------------------------------------------------------|----------|----------|---------|
|                                                         | OR                                                       | LL       | UL       | P-value |
| <b>Age (continuous variable) <sup>π</sup></b>           | 0.97                                                     | 0.97     | 0.98     | <0.001  |
| <b>Age groups</b>                                       |                                                          |          |          |         |
| 18-49                                                   | Referent                                                 | Referent | Referent |         |
| 50-64                                                   | 1.06                                                     | 0.99     | 1.13     | <0.001  |
| 65-79                                                   | 0.82                                                     | 0.76     | 0.89     | <0.001  |
| >=80                                                    | 0.27                                                     | 0.24     | 0.29     | <0.001  |
| <b>Sex</b>                                              |                                                          |          |          |         |
| Male                                                    | Referent                                                 | Referent | Referent |         |
| Female                                                  | 0.76                                                     | 0.73     | 0.78     | <0.001  |
| <b>Comorbidities</b>                                    |                                                          |          |          |         |
| Obesity <sup>§</sup>                                    | 0.77                                                     | 0.73     | 0.81     | <0.001  |
| Obstructive sleep apnea <sup>α</sup>                    | 1.17                                                     | 1.10     | 1.24     | <0.001  |
| Hypertension <sup>§</sup>                               | 0.88                                                     | 0.85     | 0.91     | <0.001  |
| Diabetes <sup>§</sup>                                   | 0.82                                                     | 0.78     | 0.86     | <0.001  |
| Heart failure <sup>@</sup>                              | 0.72                                                     | 0.69     | 0.76     | <0.001  |
| Coronary artery disease <sup>β</sup>                    | 0.87                                                     | 0.84     | 0.91     | <0.001  |
| Chronic pulmonary disease <sup>§</sup>                  | 0.87                                                     | 0.83     | 0.92     | <0.001  |
| Chronic kidney disease <sup>∞</sup> (stage 3 more more) | 0.76                                                     | 0.69     | 0.84     | <0.001  |
| Prior coronary artery bypass graft <sup>@</sup>         | 0.93                                                     | 0.86     | 1.01     | 0.072   |
| Hyperthyroidism <sup>Ω</sup>                            | 0.51                                                     | 0.42     | 0.61     | <0.001  |
| Alcohol abuse <sup>§</sup>                              | 0.28                                                     | 0.24     | 0.32     | <0.001  |
| Mitral valve disease <sup>μ</sup>                       | 0.89                                                     | 0.84     | 0.95     | 0.001   |
| Prior stroke/Transient ischemic attack <sup>©</sup>     | 0.91                                                     | 0.85     | 0.98     | 0.007   |

|                                                                  |          |          |          |        |
|------------------------------------------------------------------|----------|----------|----------|--------|
| Vascular Disease history <sup>§</sup>                            | 0.99     | 0.91     | 1.07     | 0.682  |
| Anemia <sup>§</sup>                                              | 0.77     | 0.72     | 0.84     | <0.001 |
| <b>Median household income category for patient's zip code #</b> |          |          |          |        |
| 1. 0-25th percentile                                             | Referent | Referent | Referent |        |
| 2. 26-50th percentile                                            | 1.33     | 1.26     | 1.40     | 0.002  |
| 3. 51-75th percentile                                            | 1.48     | 1.40     | 1.56     | <0.001 |
| 4. 76-100th percentile                                           | 1.92     | 1.82     | 2.02     | <0.001 |
| <b>Primary Payer</b>                                             |          |          |          |        |
| Medicare                                                         | Referent | Referent | Referent |        |
| Medicaid                                                         | 0.72     | 0.64     | 0.80     | 0.003  |
| Private including health maintenance organization                | 1.11     | 1.05     | 1.17     | <0.001 |
| Self-pay/no charge/other                                         | 0.53     | 0.47     | 0.59     | <0.001 |
| <b>Hospital characteristics</b>                                  |          |          |          |        |
| <b>Hospital bed size <sup>‡</sup></b>                            |          |          |          |        |
| Small                                                            | Referent | Referent | Referent |        |
| Medium                                                           | 2.84     | 2.59     | 3.11     | <0.001 |
| Large                                                            | 4.64     | 4.26     | 5.06     | <0.001 |
| <b>Hospital teaching status<sup>§</sup></b>                      |          |          |          |        |
| Non-teaching                                                     | Referent | Referent | Referent |        |
| Teaching                                                         | 2.90     | 2.79     | 3.01     | <0.001 |
| <b>Admission type</b>                                            |          |          |          |        |
| Non-elective                                                     | Referent | Referent | Referent |        |
| Elective                                                         | 17.48    | 16.85    | 18.14    | <0.001 |
| <b>Admission day</b>                                             |          |          |          |        |
| Weekdays                                                         | Referent | Referent | Referent |        |
| Weekend                                                          | 0.29     | 0.27     | 0.32     | <0.001 |

§: Variables are AHRQ co-morbidity measures.

||: Charlson/Deyo Co-morbidity index (CCI) was calculated as per Deyo classification.

#: Represents a quartile classification of the estimated median household income of residents in the patients ZIP Code, derived from ZIP Code-demographic data obtained from Claritas. The quartiles are identified by values of 1 to 4, indicating the poorest to wealthiest populations. Because these estimates are updated annually, the value ranges vary by year. [https://www.hcup-us.ahrq.gov/db/vars/zipinc\\_qrtl/nrdnote.jsp](https://www.hcup-us.ahrq.gov/db/vars/zipinc_qrtl/nrdnote.jsp)

@: Heart failure is identified by ICD 9 codes in secondary diagnosis field and it includes systolic, diastolic and combined heart failure.

£: The bed size cutoff points divided into small, medium, and large have been done so that approximately one-third of the hospitals in a given region, location, and teaching status combination would fall within each bed size category. [https://www.hcup-us.ahrq.gov/db/vars/hosp\\_bedsiz/nrdnote.jsp](https://www.hcup-us.ahrq.gov/db/vars/hosp_bedsiz/nrdnote.jsp)

\$: A hospital is considered to be a teaching hospital if it has an AMA-approved residency program, is a member of the Council of Teaching Hospitals (COTH) or has a ratio of full-time equivalent interns and residents to beds of 0.25 or higher. [https://www.hcup-us.ahrq.gov/db/vars/hosp\\_ur\\_teach/nrdnote.jsp](https://www.hcup-us.ahrq.gov/db/vars/hosp_ur_teach/nrdnote.jsp)

α, β, ∞, ®, Ω, μ, ©: co-morbidities were identified by appropriate ICD 9 CM diagnosis codes in secondary diagnosis field (Table S3)

**Table S6. Baseline characteristics of patients of catheter ablation in atrial fibrillation with and without atrial fibrillation recurrence.**

|                                                      | Atrial Fibrillation Recurrence |            | Overall   | p-value |
|------------------------------------------------------|--------------------------------|------------|-----------|---------|
|                                                      | No                             | Yes        |           |         |
| Index admission                                      | 35396(94.7%)                   | 1964(5.3%) | 37360     |         |
| Patient level variables                              |                                |            |           |         |
| <b>Age (%)</b>                                       | 65(57-71)                      | 68(60-74)  | 65(57-72) | <0.001  |
| 18-49                                                | 10.3                           | 8.1        | 10.2      |         |
| 50-64                                                | 37.4                           | 35.0       | 37.3      |         |
| 65-79                                                | 45.0                           | 50.2       | 45.3      |         |
| >=80                                                 | 7.3                            | 6.7        | 7.2       |         |
| <b>Sex (%)</b>                                       |                                |            |           | <0.001  |
| Male                                                 | 64.6                           | 56.6       | 64.2      |         |
| Female                                               | 35.4                           | 43.4       | 35.8      |         |
| <b>Charlson co-morbidity index <sup>  </sup> (%)</b> |                                |            |           | <0.001  |
| 0                                                    | 58.2                           | 52.2       | 57.9      |         |
| 1                                                    | 24.5                           | 29.5       | 24.8      |         |
| >=2                                                  | 17.3                           | 18.3       | 17.4      |         |
| <b>Comorbidities (%)</b>                             |                                |            |           |         |
| Obesity <sup>§</sup>                                 | 15.1                           | 19.3       | 15.3      | <0.001  |
| Obstructive sleep apnea <sup>α</sup>                 | 14.3                           | 12.9       | 14.2      | 0.078   |
| Hypertension <sup>§</sup>                            | 62.6                           | 65.8       | 62.8      | 0.004   |
| Diabetes <sup>§</sup>                                | 18.7                           | 24.6       | 19.0      | <0.001  |
| Heart failure <sup>@</sup>                           | 15.9                           | 15.4       | 15.9      | 0.613   |
| Coronary artery disease <sup>β</sup>                 | 25.1                           | 26.4       | 25.2      | 0.209   |
| Chronic pulmonary disease <sup>§</sup>               | 14.0                           | 17.5       | 14.2      | <0.001  |

|                                                                      |      |      |      |        |
|----------------------------------------------------------------------|------|------|------|--------|
| Chronic kidney disease <sup>o</sup> (stage 3 more more)              | 3.3  | 2.3  | 3.3  | 0.015  |
| Prior coronary artery bypass graft <sup>®</sup>                      | 5.3  | 5.1  | 5.3  | 0.788  |
| Hyperthyroidism <sup>Ω</sup>                                         | 0.8  | 0.4  | 0.8  | 0.044  |
| Alcohol abuse <sup>§</sup>                                           | 1.1  | 0.4  | 1.1  | 0.002  |
| Mitral Valve disease <sup>μ</sup>                                    | 7.8  | 8.9  | 7.9  | 0.066  |
| Prior stroke/Transient ischemic attack <sup>©</sup>                  | 6.6  | 6.7  | 6.6  | 0.879  |
| Vascular Disease history <sup>§</sup>                                | 4.6  | 3.9  | 4.6  | 0.110  |
| Anemia <sup>§</sup>                                                  | 5.1  | 7.0  | 5.2  | <0.001 |
| <b>Median household income category for patient's zip code # (%)</b> |      |      |      | <0.001 |
| 1. 0-25th percentile                                                 | 18.4 | 19.1 | 18.4 |        |
| 2. 26-50th percentile                                                | 22.2 | 26.9 | 22.4 |        |
| 3. 51-75th percentile                                                | 26.6 | 25.4 | 26.5 |        |
| 4. 76-100th percentile                                               | 31.1 | 26.6 | 30.9 |        |
| <b>Primary Payer (%)</b>                                             |      |      |      | <0.001 |
| Medicare                                                             | 51.7 | 57.2 | 52.0 |        |
| Medicaid                                                             | 2.6  | 4.2  | 2.7  |        |
| Private including health maintenance organization                    | 42.7 | 35.7 | 42.3 |        |
| Self-pay/no charge/other                                             | 3.0  | 2.9  | 3.0  |        |
| <b>Hospital characteristics</b>                                      |      |      |      |        |
| <b>Hospital bed size <sup>£</sup> (%)</b>                            |      |      |      | <0.001 |
| Small                                                                | 3.4  | 4.1  | 3.5  |        |
| Medium                                                               | 17.5 | 21.2 | 17.7 |        |
| Large                                                                | 79.1 | 74.7 | 78.9 |        |
| <b>Hospital teaching status <sup>§</sup> (%)</b>                     |      |      |      | 0.230  |
| Non-teaching                                                         | 25.2 | 24.0 | 25.1 |        |

|                                                 |                    |                    |                    |        |
|-------------------------------------------------|--------------------|--------------------|--------------------|--------|
| Teaching                                        | 74.8               | 76.0               | 74.9               |        |
| <b>Hospital Volume (%)</b>                      |                    |                    |                    | 0.023  |
| <50                                             | 45.6               | 47.1               | 45.9               |        |
| 50 to 100                                       | 24.5               | 25.8               | 24.5               |        |
| >100                                            | 30.0               | 27.1               | 29.9               |        |
| <b>Admission type (%)</b>                       |                    |                    |                    | <0.001 |
| Non-elective                                    | 29.7               | 33.9               | 29.9               |        |
| Elective                                        | 70.3               | 66.1               | 70.1               |        |
| <b>Admission day (%)</b>                        |                    |                    |                    | 0.130  |
| Weekdays                                        | 96.2               | 95.6               | 96.2               |        |
| Weekend                                         | 3.8                | 4.5                | 3.8                |        |
| <b>Disposition (%)</b>                          |                    |                    |                    | 0.011  |
| Home                                            | 97.9               | 98.8               | 97.9               |        |
| Facility/others                                 | 1.9                | 1.1                | 1.8                |        |
| In hospital Mortality (%)                       | 0.2                | 0.0                | 0.1                | 0.084  |
| Length of stay (Median, IQR) days               | 1(1-2)             | 2(1-4)             | 1(1-3)             | <0.001 |
| Cost of hospitalization (Median, IQR)<br>USD \$ | 23581(17282-30209) | 22318(15235-30314) | 23414(17004-30220) | <0.001 |

§: Variables are AHRQ co-morbidity measures.

||: Charlson/Deyo Co-morbidity index (CCI) was calculated as per Deyo classification.

#: Represents a quartile classification of the estimated median household income of residents in the patients ZIP Code, derived from ZIP Code-demographic data obtained from Claritas. The quartiles are identified by values of 1 to 4, indicating the poorest to wealthiest populations. Because these estimates are updated annually, the value ranges vary by year. [https://www.hcup-us.ahrq.gov/db/vars/zipinc\\_qrtl/nrdnote.jsp](https://www.hcup-us.ahrq.gov/db/vars/zipinc_qrtl/nrdnote.jsp)

@: Heart failure is identified by ICD 9 codes in secondary diagnosis field and it includes systolic, diastolic and combined heart failure.

£: The bed size cutoff points divided into small, medium, and large have been done so that approximately one-third of the hospitals in a given region, location, and teaching status combination would fall within each bed size category. [https://www.hcup-us.ahrq.gov/db/vars/hosp\\_bedsiz/nrdnote.jsp](https://www.hcup-us.ahrq.gov/db/vars/hosp_bedsiz/nrdnote.jsp)

\$: A hospital is considered to be a teaching hospital if it has an AMA-approved residency program, is a member of the Council of Teaching Hospitals (COH) or has a ratio of full-time equivalent interns and residents to beds of 0.25 or higher. [https://www.hcup-us.ahrq.gov/db/vars/hosp\\_ur\\_teach/nrdnote.jsp](https://www.hcup-us.ahrq.gov/db/vars/hosp_ur_teach/nrdnote.jsp)

α, β, ∞, ®, Ω, μ, ©: co-morbidities were identified by appropriate ICD 9 CM diagnosis codes in secondary diagnosis field (Table S3)



**Table S7. Multivariate analysis of 30 and 90-day readmission in atrial fibrillation patients.**

|                                                 | 30-day readmission |          |          |         | 90-day readmission |          |          |         |
|-------------------------------------------------|--------------------|----------|----------|---------|--------------------|----------|----------|---------|
|                                                 | HR                 | LL       | UL       | p-value | HR                 | LL       | UL       | p-value |
| <b>Age (continuous variable)<sup>π</sup></b>    | 1.01               | 1.01     | 1.01     | <0.001  | 1.01               | 1.01     | 1.01     | <0.001  |
| <b>Age group</b>                                |                    |          |          |         |                    |          |          |         |
| 18-49                                           | Referent           | Referent | Referent |         | Referent           | Referent | Referent |         |
| 50-64                                           | 1.34               | 1.29     | 1.40     | <0.001  | 1.29               | 1.25     | 1.33     | <0.001  |
| 65-79                                           | 1.26               | 1.20     | 1.32     | <0.001  | 1.20               | 1.16     | 1.25     | <0.001  |
| >=80                                            | 1.36               | 1.29     | 1.43     | <0.001  | 1.29               | 1.24     | 1.34     | <0.001  |
| <b>Sex</b>                                      |                    |          |          |         |                    |          |          |         |
| Male                                            | Referent           | Referent | Referent |         | Referent           | Referent | Referent |         |
| Female                                          | 1.10               | 1.08     | 1.12     | <0.001  | 1.10               | 1.09     | 1.12     | <0.001  |
| Catheter ablation of atrial fibrillation        | 1.02               | 0.97     | 1.07     | 0.423   | 0.89               | 0.86     | 0.93     | <0.001  |
| <b>Charlson co-morbidity index<sup>  </sup></b> |                    |          |          |         |                    |          |          |         |
| 0                                               | Referent           | Referent | Referent |         | Referent           | Referent | Referent |         |
| 1                                               | 1.25               | 1.22     | 1.28     | <0.001  | 1.22               | 1.20     | 1.24     | <0.001  |
| >=2                                             | 1.64               | 1.60     | 1.70     | <0.001  | 1.53               | 1.49     | 1.56     | <0.001  |
| <b>Comorbidities</b>                            |                    |          |          |         |                    |          |          |         |
| Obesity <sup>§</sup>                            | 0.93               | 0.91     | 0.95     | <0.001  | 0.96               | 0.95     | 0.98     | <0.001  |
| Obstructive sleep apnea <sup>α</sup>            | 0.99               | 0.96     | 1.02     | 0.498   | 1.01               | 0.99     | 1.04     | 0.384   |
| Hypertension <sup>§</sup>                       | 0.99               | 0.97     | 1.00     | 0.106   | 0.99               | 0.98     | 1.00     | 0.249   |
| Diabetes <sup>§</sup>                           | 1.04               | 1.02     | 1.06     | <0.001  | 1.03               | 1.02     | 1.05     | <0.001  |
| Heart failure <sup>@</sup>                      | 1.14               | 1.12     | 1.16     | <0.001  | 1.13               | 1.12     | 1.15     | <0.001  |



|                                       |          |          |          |        |          |          |          |        |
|---------------------------------------|----------|----------|----------|--------|----------|----------|----------|--------|
| Non-teaching                          | Referent | Referent | Referent |        | Referent | Referent | Referent |        |
| Teaching                              | 1.03     | 1.01     | 1.05     | <0.001 | 1.03     | 1.02     | 1.04     | <0.001 |
| <b>Hospital bed size <sup>£</sup></b> |          |          |          |        |          |          |          |        |
| Small                                 | Referent | Referent | Referent |        | Referent | Referent | Referent |        |
| Medium                                | 1.01     | 0.98     | 1.03     | 0.740  | 1.01     | 0.99     | 1.03     | 0.594  |
| Large                                 | 1.00     | 0.98     | 1.03     | 0.727  | 1.01     | 0.99     | 1.03     | 0.269  |
| <b>Admission type</b>                 |          |          |          |        |          |          |          |        |
| Non-elective                          | Referent | Referent | Referent |        | Referent | Referent | Referent |        |
| Elective                              | 0.88     | 0.86     | 0.91     | <0.001 | 0.92     | 0.90     | 0.94     | <0.001 |
| <b>Admission day</b>                  |          |          |          |        |          |          |          |        |
| Weekdays                              | Referent | Referent | Referent |        | Referent | Referent | Referent |        |
| Weekend                               | 1.01     | 0.99     | 1.02     | 0.595  | 0.99     | 0.98     | 1.01     | 0.341  |
| <b>Disposition</b>                    |          |          |          |        |          |          |          |        |
| Home                                  | Referent | Referent | Referent |        | Referent | Referent | Referent |        |
| Facility/others                       | 1.22     | 1.19     | 1.25     | <0.001 | 1.19     | 1.17     | 1.21     | <0.001 |
| <b>Length of stay (days)</b>          |          |          |          |        |          |          |          |        |
| 1                                     | Referent | Referent | Referent |        | Referent | Referent | Referent |        |
| 2 to 3                                | 1.20     | 1.18     | 1.23     | <0.001 | 1.19     | 1.17     | 1.21     | <0.001 |
| >3                                    | 1.53     | 1.50     | 1.57     | <0.001 | 1.45     | 1.43     | 1.47     | <0.001 |

§: Variables are AHRQ co-morbidity measures.

||: Charlson/Deyo Co-morbidity index (CCI) was calculated as per Deyo classification.

#: Represents a quartile classification of the estimated median household income of residents in the patients ZIP Code, derived from ZIP Code-demographic data obtained from Claritas. The quartiles are identified by values of 1 to 4, indicating the poorest to wealthiest populations. Because these estimates are updated annually, the value ranges vary by year. [https://www.hcup-us.ahrq.gov/db/vars/zipinc\\_qrtl/nrdnote.jsp](https://www.hcup-us.ahrq.gov/db/vars/zipinc_qrtl/nrdnote.jsp)

@: Heart failure is identified by ICD 9 codes in secondary diagnosis field and it includes systolic, diastolic and combined heart failure.

£: The bed size cutoff points divided into small, medium, and large have been done so that approximately one-third of the hospitals in a given region, location, and teaching status combination would fall within each bed size category. [https://www.hcup-us.ahrq.gov/db/vars/hosp\\_bedsizes/nrdnote.jsp](https://www.hcup-us.ahrq.gov/db/vars/hosp_bedsizes/nrdnote.jsp)

\$. A hospital is considered to be a teaching hospital if it has an AMA-approved residency program, is a member of the Council of Teaching Hospitals (COTH) or has a ratio of full-time equivalent interns and residents to beds of 0.25 or higher. [https://www.hcup-us.ahrq.gov/db/vars/hosp\\_ur\\_teach/nrdnote.jsp](https://www.hcup-us.ahrq.gov/db/vars/hosp_ur_teach/nrdnote.jsp);  $\alpha$ ,  $\beta$ ,  $\infty$ ,  $\otimes$ ,  $\Omega$ ,  $\mu$ ,  $\odot$ : co-morbidities were identified by appropriate ICD 9 CM diagnosis codes in secondary diagnosis field (Table S3)

**Table S8. Impact of catheter ablation on 90-day readmission in different subgroups of atrial fibrillations.**

| Subgroups                                               | Sub group analysis of 90-day readmission |      |      |         |
|---------------------------------------------------------|------------------------------------------|------|------|---------|
|                                                         | HR                                       | LL   | HL   | p-value |
| <b>Age</b>                                              |                                          |      |      |         |
| 18-49                                                   | 1.04                                     | 0.88 | 1.22 | 0.638   |
| 50-64                                                   | 0.83                                     | 0.77 | 0.89 | <0.001  |
| 65-79                                                   | 0.89                                     | 0.84 | 0.95 | <0.001  |
| >=80                                                    | 1.00                                     | 0.90 | 1.11 | 0.927   |
| <b>Sex</b>                                              |                                          |      |      |         |
| Male                                                    | 0.87                                     | 0.83 | 0.92 | <0.001  |
| Female                                                  | 0.91                                     | 0.85 | 0.96 | 0.001   |
| <b>Charlson co-morbidity index <sup>  </sup></b>        |                                          |      |      |         |
| 0                                                       | 0.91                                     | 0.85 | 0.97 | 0.003   |
| 1                                                       | 0.93                                     | 0.86 | 1.01 | 0.066   |
| >=2                                                     | 0.85                                     | 0.80 | 0.92 | <0.001  |
| <b>Comorbidities</b>                                    |                                          |      |      |         |
| Obesity <sup>§</sup>                                    | 0.99                                     | 0.90 | 1.10 | 0.875   |
| Obstructive sleep apnea <sup>α</sup>                    | 0.87                                     | 0.77 | 0.98 | 0.019   |
| Hypertension <sup>§</sup>                               | 0.88                                     | 0.84 | 0.93 | <0.001  |
| Diabetes <sup>§</sup>                                   | 0.92                                     | 0.85 | 0.99 | 0.035   |
| Heart failure <sup>@</sup>                              | 0.90                                     | 0.83 | 0.97 | 0.004   |
| Coronary artery disease <sup>β</sup>                    | 0.89                                     | 0.83 | 0.95 | 0.001   |
| Chronic pulmonary disease <sup>§</sup>                  | 0.91                                     | 0.84 | 1.00 | 0.037   |
| Chronic kidney disease <sup>∞</sup> (stage 3 more more) | 0.94                                     | 0.81 | 1.08 | 0.366   |
| Prior coronary artery bypass graft <sup>®</sup>         | 0.82                                     | 0.71 | 0.94 | 0.006   |
| Hyperthyroidism <sup>Ω</sup>                            | 1.01                                     | 0.67 | 1.52 | 0.975   |
| Alcohol abuse <sup>§</sup>                              | 0.73                                     | 0.51 | 1.05 | 0.094   |
| Mitral Valve disease <sup>μ</sup>                       | 0.86                                     | 0.76 | 0.98 | 0.025   |

|                                                                                                                                                               |      |      |      |        |
|---------------------------------------------------------------------------------------------------------------------------------------------------------------|------|------|------|--------|
| Prior stroke/Transient ischemic attack <sup>©</sup>                                                                                                           | 0.90 | 0.79 | 1.03 | 0.122  |
| Vascular Disease history <sup>§</sup>                                                                                                                         | 0.81 | 0.69 | 0.94 | 0.005  |
| Anemia <sup>§</sup>                                                                                                                                           | 0.87 | 0.77 | 0.98 | 0.023  |
| <b>Median household income category for patient's zip code #</b>                                                                                              |      |      |      |        |
| 1. 0-25th percentile                                                                                                                                          | 0.87 | 0.80 | 0.95 | 0.001  |
| 2. 26-50th percentile                                                                                                                                         | 0.88 | 0.81 | 0.95 | 0.002  |
| 3. 51-75th percentile                                                                                                                                         | 0.90 | 0.83 | 0.98 | 0.013  |
| 4. 76-100th percentile                                                                                                                                        | 0.88 | 0.82 | 0.96 | 0.002  |
| <b>Primary Payer</b>                                                                                                                                          |      |      |      |        |
| Medicare                                                                                                                                                      | 0.96 | 0.93 | 0.99 | 0.025  |
| Medicaid                                                                                                                                                      | 0.84 | 0.73 | 0.97 | 0.019  |
| Private including health maintenance organization                                                                                                             | 0.85 | 0.78 | 0.92 | <0.001 |
| Self-pay/no charge/other                                                                                                                                      | 0.96 | 0.76 | 1.23 | 0.765  |
| <b>Hospital characteristics</b>                                                                                                                               |      |      |      |        |
| <b>Hospital bed size <sup>£</sup></b>                                                                                                                         |      |      |      |        |
| Small                                                                                                                                                         | 0.92 | 0.76 | 1.12 | 0.401  |
| Medium                                                                                                                                                        | 0.83 | 0.75 | 0.91 | <0.001 |
| Large                                                                                                                                                         | 0.89 | 0.85 | 0.93 | <0.001 |
| <b>Hospital teaching status<sup>§</sup></b>                                                                                                                   |      |      |      |        |
| Non-teaching                                                                                                                                                  | 0.91 | 0.84 | 0.98 | 0.009  |
| Teaching                                                                                                                                                      | 0.87 | 0.82 | 0.91 | <0.001 |
| <b>Admission type</b>                                                                                                                                         |      |      |      |        |
| Non-elective                                                                                                                                                  | 0.88 | 0.83 | 0.94 | <0.001 |
| Elective                                                                                                                                                      | 0.79 | 0.74 | 0.84 | <0.001 |
| <b>Admission day</b>                                                                                                                                          |      |      |      |        |
| Weekdays                                                                                                                                                      | 0.86 | 0.82 | 0.89 | <0.001 |
| Weekend                                                                                                                                                       | 1.00 | 0.86 | 1.16 | 0.948  |
| <sup>§</sup> : Variables are AHRQ co-morbidity measures.<br><sup>  </sup> : Charlson/Deyo Co-morbidity index (CCI) was calculated as per Deyo classification. |      |      |      |        |

#: Represents a quartile classification of the estimated median household income of residents in the patients ZIP Code, derived from ZIP Code-demographic data obtained from Claritas. The quartiles are identified by values of 1 to 4, indicating the poorest to wealthiest populations. Because these estimates are updated annually, the value ranges vary by year. [https://www.hcup-us.ahrq.gov/db/vars/zipinc\\_qrtl/nrdnote.jsp](https://www.hcup-us.ahrq.gov/db/vars/zipinc_qrtl/nrdnote.jsp)

@: Heart failure is identified by ICD 9 codes in secondary diagnosis field and it includes systolic, diastolic and combined heart failure.

£: The bed size cutoff points divided into small, medium, and large have been done so that approximately one-third of the hospitals in a given region, location, and teaching status combination would fall within each bed size category. [https://www.hcup-us.ahrq.gov/db/vars/hosp\\_bedsiz/nrdnote.jsp](https://www.hcup-us.ahrq.gov/db/vars/hosp_bedsiz/nrdnote.jsp)

\$: A hospital is considered to be a teaching hospital if it has an AMA-approved residency program, is a member of the Council of Teaching Hospitals (COTH) or has a ratio of full-time equivalent interns and residents to beds of 0.25 or higher. [https://www.hcup-us.ahrq.gov/db/vars/hosp\\_ur\\_teach/nrdnote.jsp](https://www.hcup-us.ahrq.gov/db/vars/hosp_ur_teach/nrdnote.jsp)

α, β, ∞, ®, Ω, μ, ©: co-morbidities were identified by appropriate ICD 9 CM diagnosis codes in secondary diagnosis field (Table S3)

**Figure S1. Kaplan Meier survival curve for 30-day readmission.**

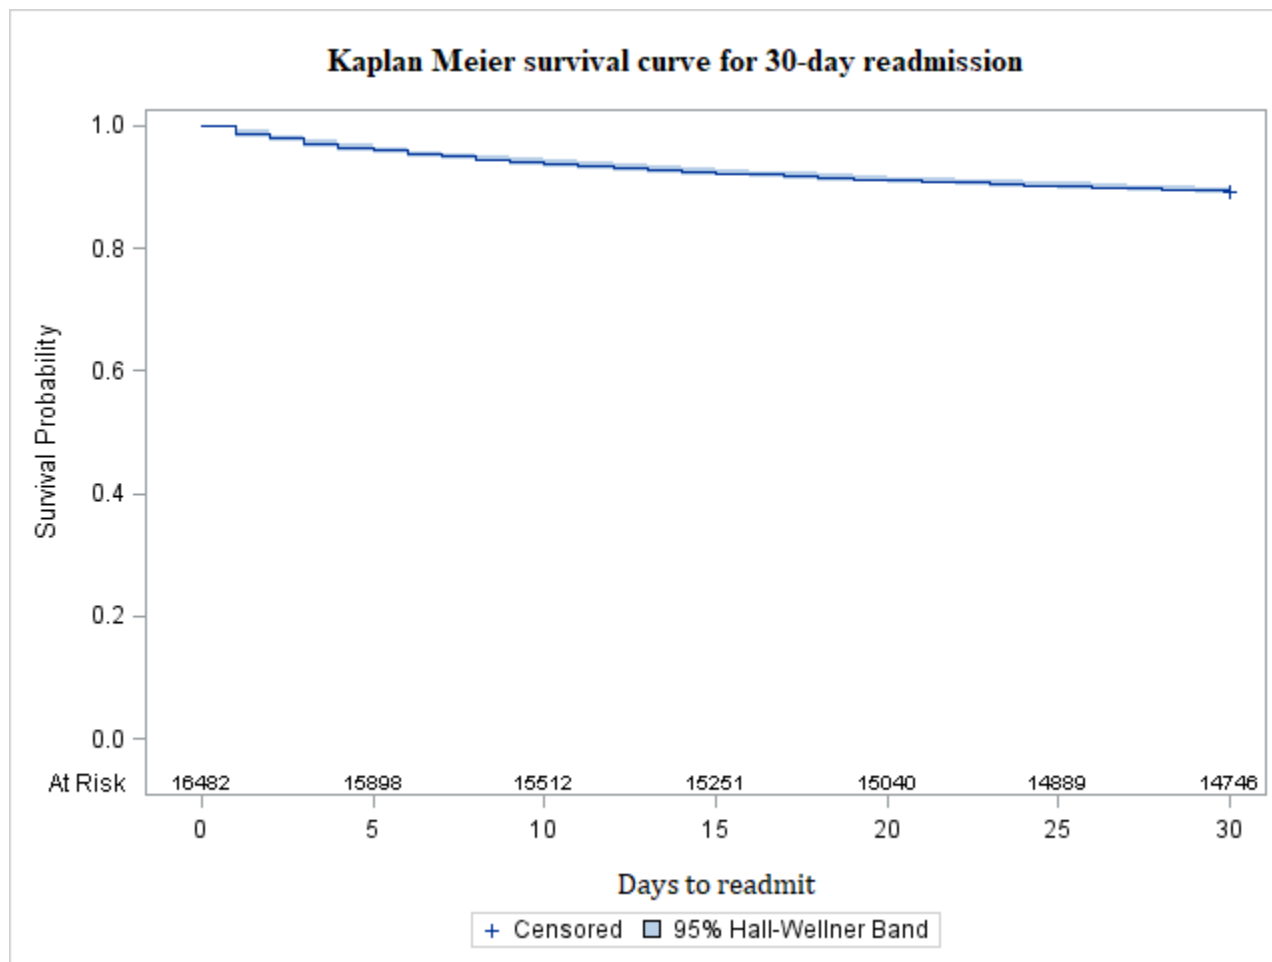



**Figure S2. Kaplan Meier survival cure for 90-day readmission.**

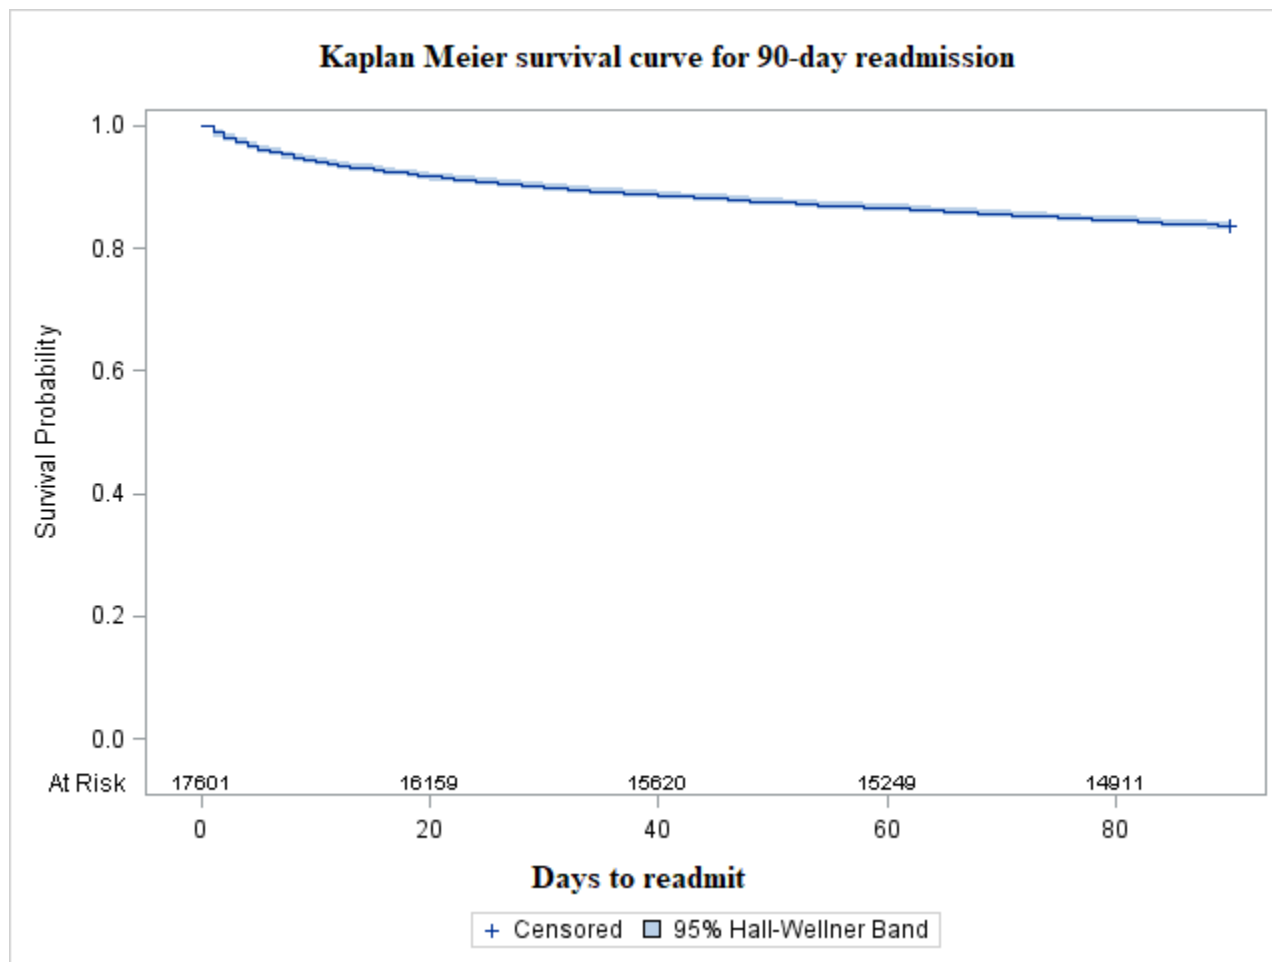

**Figure S3. Kaplan Meier survival of atrial fibrillation recurrence over 90 days.**

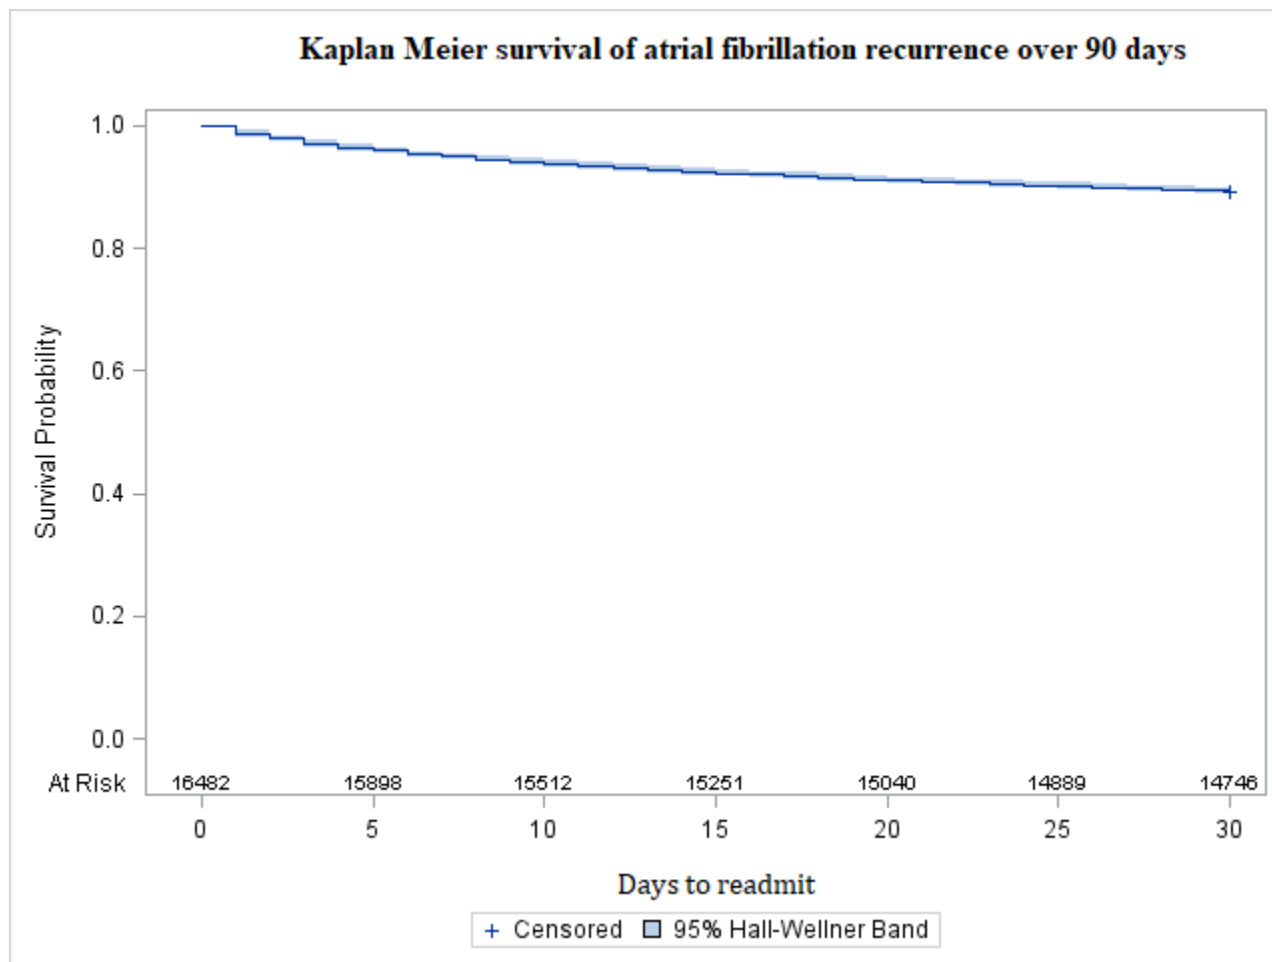

Supplement: JAH3-7-e009294-s001.pdf [file JAH3-7-e009294-s001.pdf]
